# Supplementary material for: The drivers of West Nile virus human illness in the Chicago, Illinois, USA area: Fine scale dynamic effects of weather, mosquito infection, social, and biological conditions
Source: PubMed Central journal article supplement (PMC7241786; doi:10.1371/journal.pone.0227160), 2020-05-21
Supplement: pone.0227160.s003.pdf [file pone.0227160.s003.pdf]

# PLOS ONE

## The drivers of West Nile virus human illness in the Chicago, Illinois, USA area : fine scale dynamic effects of weather, mosquito infection, social, and biological conditions --Manuscript Draft--

|                               |                                                                                                                                                                                                                                                                                                                                                                                                                                                                                                                                                                                                                                                                                                                                                                                                                                                                                                                                                                                                                                                                                                                                                                                                                                                                                                                                                                                                                                                                                                                                                                                                                                                                                                                                                                                                                                   |
|-------------------------------|-----------------------------------------------------------------------------------------------------------------------------------------------------------------------------------------------------------------------------------------------------------------------------------------------------------------------------------------------------------------------------------------------------------------------------------------------------------------------------------------------------------------------------------------------------------------------------------------------------------------------------------------------------------------------------------------------------------------------------------------------------------------------------------------------------------------------------------------------------------------------------------------------------------------------------------------------------------------------------------------------------------------------------------------------------------------------------------------------------------------------------------------------------------------------------------------------------------------------------------------------------------------------------------------------------------------------------------------------------------------------------------------------------------------------------------------------------------------------------------------------------------------------------------------------------------------------------------------------------------------------------------------------------------------------------------------------------------------------------------------------------------------------------------------------------------------------------------|
| <b>Manuscript Number:</b>     | PONE-D-19-34216R1                                                                                                                                                                                                                                                                                                                                                                                                                                                                                                                                                                                                                                                                                                                                                                                                                                                                                                                                                                                                                                                                                                                                                                                                                                                                                                                                                                                                                                                                                                                                                                                                                                                                                                                                                                                                                 |
| <b>Article Type:</b>          | Research Article                                                                                                                                                                                                                                                                                                                                                                                                                                                                                                                                                                                                                                                                                                                                                                                                                                                                                                                                                                                                                                                                                                                                                                                                                                                                                                                                                                                                                                                                                                                                                                                                                                                                                                                                                                                                                  |
| <b>Full Title:</b>            | The drivers of West Nile virus human illness in the Chicago, Illinois, USA area : fine scale dynamic effects of weather, mosquito infection, social, and biological conditions                                                                                                                                                                                                                                                                                                                                                                                                                                                                                                                                                                                                                                                                                                                                                                                                                                                                                                                                                                                                                                                                                                                                                                                                                                                                                                                                                                                                                                                                                                                                                                                                                                                    |
| <b>Short Title:</b>           | Fine scale drivers of West Nile virus human illness in Chicago                                                                                                                                                                                                                                                                                                                                                                                                                                                                                                                                                                                                                                                                                                                                                                                                                                                                                                                                                                                                                                                                                                                                                                                                                                                                                                                                                                                                                                                                                                                                                                                                                                                                                                                                                                    |
| <b>Corresponding Author:</b>  | Rebecca Lee Smith, D.V.M., M.S., Ph.D.<br>University of Illinois College of Veterinary Medicine<br>Urbana, IL UNITED STATES                                                                                                                                                                                                                                                                                                                                                                                                                                                                                                                                                                                                                                                                                                                                                                                                                                                                                                                                                                                                                                                                                                                                                                                                                                                                                                                                                                                                                                                                                                                                                                                                                                                                                                       |
| <b>Keywords:</b>              | West Nile Virus; Spatial Epidemiology; vector-borne disease; Statistical modeling                                                                                                                                                                                                                                                                                                                                                                                                                                                                                                                                                                                                                                                                                                                                                                                                                                                                                                                                                                                                                                                                                                                                                                                                                                                                                                                                                                                                                                                                                                                                                                                                                                                                                                                                                 |
| <b>Abstract:</b>              | West Nile virus (WNV) has consistently been reported to be associated with human cases of illness in the region near Chicago, Illinois. However, the number of reported cases of human illness varies across years, with intermittent outbreaks. Several dynamic factors, including temperature, rainfall, and infection status of vector mosquito populations, are responsible for much of these observed variations. However, local landscape structure and human demographic characteristics also play a key role. The geographic and temporal scales used to analyze such complex data affect the observed associations. Here, we used spatial and statistical modeling approaches to investigate the factors that drive the outcome of WNV human illness on fine temporal and spatial scales. Our approach included multi-level modeling of long-term weekly data from 2005 to 2016, with weekly measures of mosquito infection, human illness and weather combined with more stable landscape and demographic factors on the geographical scale of 1000m hexagons. We found that hot weather conditions, warm winters, and higher MIR in earlier weeks increased the probability of an area of having a WNV human case. Higher population and the proportion of urban light intensity in an area also increased the probability of observing a WNV human case. A higher proportion of open water sources, percentage of grass land, deciduous forests, and housing built post 1990 decreased the probability of having a WNV case. Additionally, we found that cumulative positive mosquito pools up to 31 weeks can strongly predict the total annual human WNV cases in the Chicago region. This study helped us to improve our understanding of the fine-scale drivers of spatiotemporal variability of human WNV cases. |
| <b>Order of Authors:</b>      | Surendra Karki<br>William M Brown<br>John Uelmen<br>Marilyn O'Hara Ruiz<br>Rebecca Lee Smith, D.V.M., M.S., Ph.D.                                                                                                                                                                                                                                                                                                                                                                                                                                                                                                                                                                                                                                                                                                                                                                                                                                                                                                                                                                                                                                                                                                                                                                                                                                                                                                                                                                                                                                                                                                                                                                                                                                                                                                                 |
| <b>Opposed Reviewers:</b>     |                                                                                                                                                                                                                                                                                                                                                                                                                                                                                                                                                                                                                                                                                                                                                                                                                                                                                                                                                                                                                                                                                                                                                                                                                                                                                                                                                                                                                                                                                                                                                                                                                                                                                                                                                                                                                                   |
| <b>Response to Reviewers:</b> | Reviewer #1: Peer review report on PLOS ONE manuscript " The drivers of West Nile virus human illness: fine scale dynamic effects of weather, mosquito infection, social, and biological conditions", (Manuscript number PONE-D-19-34216).<br><br>Recommendation: Minor Revision<br><br>Comments to Authors:<br><br>This manuscript analyzes the available long-term data of mosquito infection rates, West Nile virus human cases and weather variables from 2005 to 2016 combined with landscape and demographic characteristics of two Illinois counties of the Chicago                                                                                                                                                                                                                                                                                                                                                                                                                                                                                                                                                                                                                                                                                                                                                                                                                                                                                                                                                                                                                                                                                                                                                                                                                                                        |

region in order to evaluate relationships between the factors on fine temporal and spatial scale and identify the drivers that potentially affect the presence of human WNV illness and may act as early warning predictors.

The paper is well written with a well-organized text, the data were analyzed using multi-level statistical modeling approaches and the findings are sufficiently documented and the results are valuable for a better understanding of the fine-scale drivers of spatiotemporal variability of WNV human case prevalence in an urban environment such as in the study area.

Although numerous published studies that have shed light on factors that affect WNV transmission in an area, the knowledge regarding the influence of climatic variables in correlation with the data from the entomological surveillance and the number of WNV human cases, is still limited.

For that reason, the paper makes a substantial contribution to the literature and is therefore recommended for publication in PLOS-ONE after minor revision taking into account the following general or specific comments.

- Thank you for your comments and your feedback!

#### General comments

The study uses and analyzes the 10-year data (2005 to 2014) from Cook and DuPage counties in the Chicago, Illinois region and the accuracy of the predictions of the developed model tested with the data of the same specific area.

However, according to the literature, it is well known that models predicting the WNV transmission and human WNV infections do not always have the same accuracy when applied to other areas with different mosquito fauna, weather conditions and/or geomorphological and demographic characteristics. Therefore, we consider that the study area should also be mentioned in the title.

- Thank you for the suggestion, we have made that change

Please comment and, if necessary, provide an adequate justification in the manuscript, for the reason that in this work were not included data from passive or active monitoring of WNV presence in birds and equids, which are considered by several authors as important prediction factors of the presence and spread of WNV virus in an area.

- We have added a statement (145-147) that the avian and equid surveillance programs were not consistent across the time period, and added a discussion section (467-474) about the point.

#### Specific comments

Line 170 of the manuscript: If available, please provide information on the species of Culex mosquitoes that have been tested for WNV presence as the vectorial competence of different species may vary significantly for WNV transmission to humans.

- We agree that is an important point; we have added some information as to common species in the region.

Line 179 of the manuscript: Please add a bibliographical reference in the reference section for the MIR estimation tool by Biggerstaff, 2006.

- Thank you, corrected

Line 188 of the manuscript: Please provide a definition and some additional information about the category of "probable cases of WNV" that were also included in the study along with the "confirmed cases" because the symptoms of infection by the West Nile vary in severity, with the mild forms can be easily confused with flu symptoms and usually go unreported.

- We have added the information. The difference between probable and confirmed cases is confirmatory testing by either IDPH or CDC; all cases had positive diagnostic results and clinical signs during the likely transmission season.

Lines 578-580 of the manuscript: Please, correct Reference no 39 by adding the name of the journal, volume number and pages numbers.

Messina JP, Brown W, Amore G, Kitron UD, Ruiz MO. West Nile Virus in the Greater Chicago Area: A Geographic Examination of Human Illness and Risk from 2002 to 2006. URISA Journal 2011;23: 5-18.

•Corrected

Reviewer #2: Dear authors,

This is a well written paper that deals with the determination of factors affecting the spatiotemporal variability of WNV cases in humans through identification of the fine scale drivers of WNV transmission in an urban area with a repeated history of WNV outbreaks. The findings are very interesting since they include multi-level modeling of weekly data from over a decade and they extend our knowledge in the correlation of variables related to temperature, precipitation, mosquito infection, land cover, and demographic characteristics with the probability of an area having a WNV case or not.

•Thank you

Further down please consider some comments of minor importance that may benefit the manuscript.

It seems that the infection status of avian population, as primary reservoirs of WNV, and equids, as dead-end hosts, were not included among the tested variables for modeling structure. Please note that these are critical factors implicated in the WNV transmission in order to develop predictive models.

As mentioned in the introduction, public health surveillance for WNV involves collection and testing of dead birds suspected to have died of WNV, testing of sentinel chickens or of wild birds captured for this purpose and reporting of cases of equine illness.

Could you please justify this data gap in the model structuring? Is there any surveillance system for infected avian and equids population in the study area?

In the "Introduction" you may add any relevant literature data where bird and/or equine infection rate were used for development of models predicting WNV transmission in humans. Also, in lines 440-459 of the manuscript, you could mention the fact that avian and equids infection status was not considered as a factor for prediction of WNV cases in humans in the study area.

•We have added a statement as to the inconsistent application of avian and equid surveillance in this region (145-147), and given more information about that surveillance in the discussion (467-474), including references to models using these data types.

According to the best multivariable model that was used, the proportion of open water was negatively associated with the probability of WNV cases. Also, as mentioned in the discussion, a negative association of precipitation and WNV cases was observed and this indicates that dry and hot weather conditions would increase the probability of an area being positive for a WNV case.

Instead, it is supposed that high rainfall and high percentage of water bodies in an area may favor mosquito population by increasing their breeding sites, and therefore may lead to increased WNV cases in humans. Hence, a positive correlation between precipitation and water bodies with WNV cases in humans is anticipated. Please comment.

•Open water is classified as areas in which any aquatic vegetation is submerged, as opposed to woody or herbaceous wetlands. This is not likely to be stagnant water of the type used by Culex mosquitoes for breeding. Therefore, the negative association between proportion of open water and WNV cases is most likely due to the fact that open water, as defined, does not favor the mosquito population. We have noted this in the discussion (434-438).

**Additional Information:**

**Question**

**Response**

## Financial Disclosure

Enter a financial disclosure statement that describes the sources of funding for the work included in this submission. Review the [submission guidelines](#) for detailed requirements. View published research articles from [PLOS ONE](#) for specific examples.

This statement is required for submission and **will appear in the published article** if the submission is accepted. Please make sure it is accurate.

### Unfunded studies

Enter: *The author(s) received no specific funding for this work.*

### Funded studies

Enter a statement with the following details:

- Initials of the authors who received each award
- Grant numbers awarded to each author
- The full name of each funder
- URL of each funder website
- Did the sponsors or funders play any role in the study design, data collection and analysis, decision to publish, or preparation of the manuscript?
- **NO** - Include this sentence at the end of your statement: *The funders had no role in study design, data collection and analysis, decision to publish, or preparation of the manuscript.*
- **YES** - Specify the role(s) played.

\* typeset

## Competing Interests

Use the instructions below to enter a competing interest statement for this submission. On behalf of all authors, disclose any [competing interests](#) that could be perceived to bias this work—acknowledging all financial support and any other relevant financial or non-financial competing interests.

This statement **will appear in the published article** if the submission is accepted. Please make sure it is

This publication was supported by Cooperative Agreement #U01 CK000505, funded by the Centers for Disease Control and Prevention (RLS). The funders had no role in study design, data collection and analysis, decision to publish, or preparation of the manuscript.

The authors have declared that no competing interests exist.

accurate. View published research articles from [PLOS ONE](#) for specific examples.

#### **NO authors have competing interests**

Enter: *The authors have declared that no competing interests exist.*

#### **Authors with competing interests**

Enter competing interest details beginning with this statement:

*I have read the journal's policy and the authors of this manuscript have the following competing interests: [insert competing interests here]*

\* typeset

#### **Ethics Statement**

Enter an ethics statement for this submission. This statement is required if the study involved:

- Human participants
- Human specimens or tissue
- Vertebrate animals or cephalopods
- Vertebrate embryos or tissues
- Field research

Write "N/A" if the submission does not require an ethics statement.

General guidance is provided below. Consult the [submission guidelines](#) for detailed instructions. **Make sure that all information entered here is included in the Methods section of the manuscript.**

This project was approved by the Institutional Review Boards of the University of Illinois Urbana-Champaign (#08686) and the Illinois Department of Public Health (#0950). Consent was not obtained because data were analyzed anonymously.

**Format for specific study types**

**Human Subject Research (involving human participants and/or tissue)**

- Give the name of the institutional review board or ethics committee that approved the study
- Include the approval number and/or a statement indicating approval of this research
- Indicate the form of consent obtained (written/oral) or the reason that consent was not obtained (e.g. the data were analyzed anonymously)

**Animal Research (involving vertebrate animals, embryos or tissues)**

- Provide the name of the Institutional Animal Care and Use Committee (IACUC) or other relevant ethics board that reviewed the study protocol, and indicate whether they approved this research or granted a formal waiver of ethical approval
- Include an approval number if one was obtained
- If the study involved *non-human primates*, add *additional details* about animal welfare and steps taken to ameliorate suffering
- If anesthesia, euthanasia, or any kind of animal sacrifice is part of the study, include briefly which substances and/or methods were applied

**Field Research**

Include the following details if this study involves the collection of plant, animal, or other materials from a natural setting:

- Field permit number
- Name of the institution or relevant body that granted permission

**Data Availability**

Authors are required to make all data underlying the findings described fully available, without restriction, and from the time of publication. PLOS allows rare exceptions to address legal and ethical concerns. See the [PLOS Data Policy](#) and [FAQ](#) for detailed information.

No - some restrictions will apply

A Data Availability Statement describing where the data can be found is required at submission. Your answers to this question constitute the Data Availability Statement and **will be published in the article**, if accepted.

**Important:** Stating 'data available on request from the author' is not sufficient. If your data are only available upon request, select 'No' for the first question and explain your exceptional situation in the text box.

Do the authors confirm that all data underlying the findings described in their manuscript are fully available without restriction?

**Describe where the data may be found in full sentences. If you are copying our sample text, replace any instances of XXX with the appropriate details.**

- If the data are **held or will be held in a public repository**, include URLs, accession numbers or DOIs. If this information will only be available after acceptance, indicate this by ticking the box below. For example: *All XXX files are available from the XXX database (accession number(s) XXX, XXX).*
- If the data are all contained **within the manuscript and/or Supporting Information files**, enter the following: *All relevant data are within the manuscript and its Supporting Information files.*
- If neither of these applies but you are able to provide **details of access elsewhere**, with or without limitations, please do so. For example:

*Data cannot be shared publicly because of [XXX]. Data are available from the XXX Institutional Data Access / Ethics Committee (contact via XXX) for researchers who meet the criteria for access to confidential data.*

*The data underlying the results presented in the study are available from (include the name of the third party*

Data cannot be shared publicly because of privacy concerns. Data are available from the Illinois Department of Public Health Institutional Data Access / Ethics Committee, which has imposed these restrictions for researchers who meet the criteria for access to confidential data. Contact Megan Patel, Megan.Patel@illinois.gov (Surveillance and Informatics Epidemiologist in the Office of Health Protection, Division of Infectious Disease), for information about data access.

*and contact information or URL).*

- This text is appropriate if the data are owned by a third party and authors do not have permission to share the data.

\* typeset

Additional data availability information:



UNIVERSITY OF ILLINOIS  
AT URBANA-CHAMPAIGN

**College of Veterinary Medicine**

Department of Pathobiology  
2001 South Lincoln Avenue  
Urbana, IL 61802

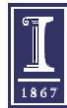

To the editor:

Please consider our revised manuscript, "**The drivers of West Nile virus human illness in the Chicago, Illinois, USA area: fine scale dynamic effects of weather, mosquito infection, social, and biological conditions**", for publication in *PLoS One*. This manuscript describes original research involving the modeling of human cases of West Nile Virus by using fine scale measures that may affect human risk. This work should appeal to a broad audience, as it both identifies information of importance to public health and describes relationships between spatial factors and human risk of infection that can inform future studies into human exposure.

We are unable to share human illness data as they are provided under a data use agreement with the Illinois Department of Public Health due to identifiability of cases at this spatial resolution. Requests for data may be sent to the Illinois Department of Public Health, Infectious Diseases.

Thank you,

A handwritten signature in black ink, appearing to read 'Rebecca Lee Smith'.

Rebecca Lee Smith, DVM MS PhD  
Assistant Professor of Epidemiology  
[rlsdvm@illinois.edu](mailto:rlsdvm@illinois.edu)  
217-300-1428

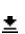

1     **The drivers of West Nile virus human illness in the Chicago, Illinois, USA area: fine**  
2     **scale dynamic effects of weather, mosquito infection, social, and biological conditions**

3  
4

5     Surendra Karki<sup>1</sup>, William M. Brown<sup>1</sup>, John Uelmen<sup>1</sup>, Marilyn O. Ruiz<sup>1</sup>, Rebecca Lee Smith<sup>1,\*</sup>

6     <sup>1</sup>Department of Pathobiology, University of Illinois, Urbana-Champaign, Illinois, USA

7

8     \*Corresponding author

9     Email: [rlsdvm@illinois.edu](mailto:rlsdvm@illinois.edu)

10

11     Short title: Fine scale drivers of West Nile virus human illness

12

## 13 **Abstract**

14 West Nile virus (WNV) has consistently been reported to be associated with human cases of  
15 illness in the region near Chicago, Illinois. However, the number of reported cases of human  
16 illness varies across years, with intermittent outbreaks. Several dynamic factors, including  
17 temperature, rainfall, and infection status of vector mosquito populations, are responsible for  
18 much of these observed variations. However, local landscape structure and human  
19 demographic characteristics also play a key role. The geographic and temporal scales used to  
20 analyze such complex data affect the observed associations. Here, we used spatial and  
21 statistical modeling approaches to investigate the factors that drive the outcome of WNV  
22 human illness on fine temporal and spatial scales. Our approach included multi-level  
23 modeling of long-term weekly data from 2005 to 2016, with weekly measures of mosquito  
24 infection, human illness and weather combined with more stable landscape and demographic  
25 factors on the geographical scale of 1000m hexagons. We found that hot weather conditions,  
26 warm winters, and higher MIR in earlier weeks increased the probability of an area of having  
27 a WNV human case. Higher population and the proportion of urban light intensity in an area  
28 also increased the probability of observing a WNV human case. A higher proportion of open  
29 water sources, percentage of grass land, deciduous forests, and housing built post 1990  
30 decreased the probability of having a WNV case. Additionally, we found that cumulative  
31 positive mosquito pools up to 31 weeks can strongly predict the total annual human WNV  
32 cases in the Chicago region. This study helped us to improve our understanding of the fine-  
33 scale drivers of spatiotemporal variability of human WNV cases.

34

## 35 **Introduction**

36 West Nile virus (WNV), a mosquito-borne zoonotic disease, was first identified in the  
37 United States in the summer of 1999 in New York City [1]. The mosquitoes of several *Culex*

38 species are the primary enzootic and bridge vectors for the transmission of WNV, and several  
39 bird species are known to contribute in the amplification of the virus [2–4]. Since its first  
40 successful invasion in New York, WNV quickly adapted to the local populations of *Culex*  
41 vector mosquitoes and avian populations and rapidly spread throughout the conterminous  
42 United States [5,6]. The first major WNV outbreak in the United States was observed in  
43 2002, when more than 4,150 human cases and 284 deaths attributable to WNV infection were  
44 reported to the CDC from 40 states compared to only 149 cases and 19 deaths from 10 states  
45 cumulatively during the three years from 1999 to 2001 [7]. This stirred a prompt public  
46 health response from federal, state, and local public health agencies and led to the  
47 establishment of a more robust surveillance of mosquitoes and birds to monitor and control  
48 the spread of WNV [8].

49         Public health surveillance for West Nile virus (WNV) involves collection and testing  
50 of *Culex* vector mosquitoes, collection and testing of dead birds suspected to have died of  
51 WNV, testing of sentinel chickens or of wild birds captured for this purpose, and reporting of  
52 cases of human and equine illness [9]. The ultimate goal of these surveillance data is to target  
53 mosquito control, and thereby reduce illness through the reduction of the number of infected  
54 vector mosquitoes, and to target educational messages to warn citizens to reduce individual  
55 exposure. One additional advantage of having a strong surveillance system in place is that the  
56 long-term data generated can be integrated with publicly available weather, landscape, and  
57 socioeconomic data and can be used effectively to identify the important drivers of WNV  
58 transmission and to develop predictive models [10,11].

59         Several earlier studies have identified some of the important drivers of WNV  
60 transmission in humans. These factors include prior weather conditions and landscape  
61 structure that affect the mosquito's biological responses, the abundance and infection status  
62 of the vector mosquitoes, demographic and social characteristic of population, individual

63 human behavior, and the level of public awareness [10–17]. For example, an analysis of 12  
64 years of mosquito testing and human illness data in Ontario, Canada showed that, while the  
65 mosquito infection rate of one week earlier was the strongest temporal predictor of human  
66 risk of WNV, an epidemic threshold based on the cumulative positive *Culex* pools up to mid-  
67 August (week 34) can be successfully used to predict human WNV epidemics [16]. In Long  
68 Island, New York, more than 65% of forecast models based on past mosquito infection and  
69 human illness correctly predicted seasonal total human WNV cases up to 9 weeks before the  
70 first reported cases [18]. Similarly, the vector index, based on a combination of vector  
71 infection and abundance was found to be highly correlated with human WNV cases in studies  
72 conducted in Larimer County, Colorado (Fauver et al., 2015), and Dallas, Texas [19].

73 Weather factors are important drivers of WNV transmission due to their direct effect  
74 in mosquito biology. When compared with human WNV cases, higher than normal average  
75 annual temperatures are associated with an increased likelihood of higher WNV disease  
76 incidence, nationally and in most regions in the United States [17]. This relationship was true  
77 in Europe, too, where abnormally high July temperature was associated with higher incidence  
78 of human WNV cases [20]. The role of precipitation is often controversial and varies by  
79 study regions. For example, higher than normal precipitation was positively associated with  
80 higher human WNV cases in the eastern region of the United States, but this relationship was  
81 reversed for the western region [21]. Another study identified drought as an important driver  
82 of WNV epidemics in the United States [22]. Local landscape structures have also been  
83 associated with human WNV incidence. The important land cover variables associated with  
84 increased risks of human WNV include proximity to wetlands [23,24], higher tree density  
85 [24], irrigated and agricultural rural areas [25], urban areas characterized by higher  
86 impervious surfaces and storm sewer systems [26], and inner suburbs characterized by older  
87 houses, moderate vegetation and moderate population [27].

88           Apart from extrinsic factors, population structure, demographic characteristics, and  
89 individual variation also play roles in WNV epidemics [28]. As people age, especially when  
90 they have a history of hypertension and immunosuppression, their risk of WNV disease  
91 increases [29,30]. Community characteristics such as income level, the age of housing,  
92 management of sewer and drainage system, mosquito abatement practices, and public health  
93 infrastructure also determines the risk of WNV human infections [12,26].

94           Different spatial scales have been used in geographical analyses to identify the drivers  
95 of human risk from WNV infections. The most commonly used spatial scale in the United  
96 States is counties [17,22,31], census tracts or Zip Code Tabulation Areas (ZCTA) [12,32],  
97 census block groups [33], and buffers of varying sizes around trap locations or human cases  
98 [24]. Each of these spatial scales has its own inherent biases, as these political boundaries do  
99 not necessarily correspond to the ecological processes of the disease in question [34].  
100 Alternatively, dividing the area into equal spaces, such as rectangular bins or hexagons, has  
101 been used to reduce some of these biases (e.g. [35]). Hexagonal grids have an additional  
102 advantage in that they reduce the edge effects, better fit curved surfaces, and have identical  
103 neighbors [36,37].

104           In Illinois, WNV human infections have been endemic since 2002, with annual  
105 variability in the number of cases [38]. The majority of the human WNV cases have been  
106 reported from the northeastern region, where the largest number of people in the state is  
107 congregated. A census tract level analysis in this region using human WNV occurrence data  
108 from the 2002 outbreak year identified that census tracts with lower population density,  
109 relatively close WNV positive dead bird specimens, a higher percentage of older white  
110 residents, and housing built between 1950 and 1959 were more likely to be associated with  
111 spatial clusters of WNV cases [12]. A follow up expanded this study to look at annual  
112 incidence of WNV human illness in northeastern Illinois from 2002 to 2006, with additional

113 variables to assess the effects of rainfall, temperature and the WNV mosquito infection rate  
114 [39]. This analysis determined that white populations and housing from the 1950s were  
115 associated with increased illness in some years, but this was not consistent. Interestingly,  
116 census tracts with lower rainfall had higher rates of WNV illness, but the mosquito infection  
117 rate was not an important variable in any of the models [39].

118         Despite the identification of some of these potential risk factors, accurate prediction  
119 of human illness cases from WNV remains elusive at the local scale, especially as it is related  
120 to dynamic weather and mosquito infection status. Using long-term data on human WNV  
121 illness and intensive mosquito surveillance for the Chicago region, we can identify the fine  
122 scale drivers of spatiotemporal variability of human WNV epidemic in an urban environment.  
123 The overall goal of this study is to determine factors affecting the spatiotemporal variability  
124 of clinical WNV incidence in people through identification of the fine scale drivers of WNV  
125 transmission in an urban area with a repeated history of WNV outbreaks. These potential  
126 drivers include dynamic mosquito infection and weather. Our specific objectives in this study  
127 are to (i) describe the fine-scale temporal and spatial patterns of human WNV illness in the  
128 Chicago region, (ii) evaluate the temporal relationships between mosquito infection and  
129 human WNV illness, and (iii) determine the fine-scale dynamic effects of weather, land  
130 cover, mosquito infection, and demographic factors on the presence of human West Nile  
131 virus illness across time and space.

132

### 133 **Materials and methods**

134         This project was approved by the Institutional Review Boards of the University of  
135 Illinois Urbana-Champaign and the Illinois Department of Public Health.

136         The two Illinois counties of Cook and DuPage, comprising Chicago and its suburbs,  
137 were included in this study. The total area covered by these two counties is nearly 5,100

138 square kilometers, and the total population in 2010 was 6.1 million. These areas were  
139 selected because of the relatively high incidence of human West Nile virus illness reported  
140 from these two counties and the long-term intensive mosquito surveillance data available for  
141 this region. The temporal window included in this study was the 24-week time period from  
142 late May to late October (weeks 22 to 45), which corresponds to the timing of mosquito  
143 activity and human WNV illness, with data for the years from 2005 to 2016. The years from  
144 2002 to 2004, during which Illinois had its first invasion from WNV, were excluded in this  
145 analysis because of the absence of mosquito testing data. Data on avian and equid  
146 surveillance were not included as these programs were not consistently applied across the  
147 time period.

148 We chose to summarize all variables into hexagons to provide a neutral spatial unit of  
149 consistent size and shape, which is not possible with political boundaries. For this, we  
150 overlaid hexagons measuring 1000 m in diameter on the outlines of Cook and DuPage  
151 counties to create a grid of 5,345 hexagons for the study area. Out of these, 328 were  
152 excluded after a comparison with fine scale population data from the 2010 U.S. Census  
153 indicated that there were no households on record within those hexagons. Thus, 5,017  
154 hexagons were included in the analysis. All independent variables related to weather, land  
155 cover, mosquito infection and demography were calculated for each hexagon, as described  
156 below.

#### 157 *Mosquito data*

158 Mosquito testing data from 2005 to 2016 were obtained from the Illinois Department  
159 of Public Health (IDPH) through a user agreement. The IDPH collates the data from local  
160 public health agencies and mosquito abatement districts across Illinois and maintains a  
161 statewide database for the results from WNV mosquito testing. The IDPH developed a  
162 mosquito surveillance protocol that local health and mosquito abatement districts are



163 expected to follow in order to standardize the mosquito collection and testing across the state.  
164 In general, the local agencies collect vector mosquitoes with gravid traps, identify the sex and  
165 species of the mosquitoes, and make pools of up to 50 mosquitoes of a single species from  
166 those captured in each trap to test for the presence of WNV infection. When fewer than 50  
167 mosquitoes are captured, a pool will consist of fewer than 50 mosquitoes. During the study  
168 period, the common tests used to identify WNV in mosquitoes included antigen assays,  
169 VecTest or the Rapid Analyte Measurement Platform (RAMP) test. Some pools were also  
170 tested by Real Time reverse transcriptase polymerase chain reaction (RT-PCR). In instances  
171 when a pool was tested using more than one type of test, only the RT-PCR results were used  
172 in the analysis. Our analysis used only the test results from pools of female *Culex*  
173 mosquitoes. Not all mosquitoes were identified to species prior to testing; however, the  
174 majority of *Culex* collected in this region belong to the species *Cx. pipiens* or *Cx. restuans*  
175 [3].

176 To determine the location of the mosquito traps, we used the existing latitude and  
177 longitude recorded in the IDPH database. In cases where the spatial data were missing, we  
178 geocoded the trap locations based on the address provided. Our analysis used all the trap  
179 locations recorded from 2005 to 2016 from Cook and DuPage counties in addition to any  
180 traps located within a 10 km radius from their boundaries (located within Lake, McHenry,  
181 Kane, Kendall, and Will counties). For each trap, the mosquito infection rate (MIR) was  
182 calculated by week and by year using the formula

183 
$$1000 * \frac{\text{number of positive pools}}{\text{total number of mosquitos in pools tested}} \quad [40].$$

184 Using MIR calculations from all traps, we developed continuous surface maps for  
185 MIR for each week and year using the inverse distance weighting (IDW) interpolation  
186 technique in ArcGIS 10.1. From this interpolated surface map for each year and week, the

187 average, minimum, and maximum MIR for each hexagon was calculated using the zonal  
188 statistics as table function in ArcGIS 10.1. A model builder platform using iteration features  
189 in ArcGIS 10.1 was used to run these processes.

#### 190 *Human illness data*

191 Records of human WNV cases in Illinois were obtained from the IDPH through a user  
192 agreement. All confirmed and probable cases of WNV reported to the IDPH by medical and  
193 public health personnel for the study area were included in this study; the state of Illinois  
194 mandates reporting of WNV to local public health departments, which then report all cases to  
195 IDPH. Probable cases are those that meet clinical criteria during the season when  
196 transmission is likely to occur and meet laboratory criteria for West Nile virus by serology  
197 (IgM capture ELISA) or polymerase chain reaction, while confirmed cases are those with  
198 confirmatory test results from the IDPH or the Centers for Disease Control and Prevention.  
199 All the human WNV cases in Cook and DuPage counties reported from 2005 to 2016 were  
200 geocoded and aggregated by hexagons for each week and year. The data were converted into  
201 the binary form of presence or absence of a WNV case in a given hexagon and week.

#### 202 *Demographic data*

203 The demographic variables included were total population, racial composition,  
204 housing age, and income level. The total population and racial composition included the  
205 number of White, African American, Asian, and Hispanic people at the census block level, as  
206 reported in the 2010 U.S. Census. The racial population data was converted to the percentage  
207 of White, African American, Asian, and Hispanic people in each hexagon. The income data  
208 for the block group level were obtained from the 2015 American Community Survey.  
209 Housing age was included as the proportions of housing built in different time periods, which  
210 was obtained at the block group level from the 2015 American Community Survey. We  
211 divided housing age into four different time-periods: pre-World War II houses (built before

212 1939), post-World War II houses (built between 1940 and 1969), houses built between 1970  
213 and 1989, and houses built after 1990. These demographic data were processed in ArcGIS  
214 using the intersection tool to calculate a parameter for each hexagon.

#### 215 *Landcover data*

216 Landcover data for the entire United States was obtained from the national landcover  
217 database (NLCD) for the years 2006 and 2011. The NLCD database is a Landsat based  
218 landcover data available at a 30 m resolution ([www.mrlc.gov](http://www.mrlc.gov)). The landcover raster was  
219 clipped for Cook and DuPage counties, including a surrounding 1 km buffer. From this  
220 clipped raster, the total number of pixels for each land category within each hexagon was  
221 calculated using the tabulate as area tool in ArcGIS 10.1. The proportion of each land cover  
222 category for each hexagon was then calculated by dividing the number of pixels for that  
223 category by the total number of pixels for all categories. In Cook and DuPage counties, 15  
224 different types of landcover were available: urban areas (developed open space, developed  
225 low intensity, developed medium intensity, developed high intensity), forests (deciduous,  
226 evergreen and mixed), barren land, shrubs, grassland, pasture, cultivated crops, woody  
227 wetlands, herbaceous wetlands, and open water. The land cover data from 2006 was used to  
228 analyze the WNV cases for the years from 2006 to 2010, while the land cover data from 2011  
229 was used for 2011 to 2016.

#### 230 *Weather data*

231 Spatial weather data on daily mean temperature and precipitation from 2005 to 2016  
232 were obtained from the PRISM Climate Group (PRISM Climate Group, Oregon State  
233 University, <http://prism.oregonstate.edu>). The PRISM daily data are available as spatial grids  
234 of 4 km resolution, which are calculated through interpolation and statistical techniques using  
235 point data from weather monitoring networks across the country combined with topographic  
236 data. These daily data were used to calculate the weekly temperature and precipitation. For

237 our analysis, the weekly mean temperature was calculated by taking the average of the seven  
238 daily averages for that week, and the weekly precipitation was calculated as a sum of the  
239 daily precipitation for that week. Finally, the weekly temperature and precipitation for each  
240 year and week for each hexagon was calculated by using the zonal statistics as table function  
241 in ArcGIS 10.1. We also calculated average January temperature for each hexagon for each  
242 year from the daily data as a proxy for the winter temperature.

#### 243 *Statistical methods*

244 To assess the temporal relationship between human illness and MIR, we calculated  
245 the Spearman rank correlation between the weekly MIR of 1-6 weeks lag and human cases.  
246 We repeated this analysis on the subsets of years with high numbers of WNV cases (more  
247 than 100 human cases; 2005, 2006, 2012 and 2016) and those with low numbers of WNV  
248 cases (less than 100 cases; 2007 - 2009, 2010, 2011, 2013 - 2015) to examine if the  
249 relationship between MIR and human cases varies in high and low years. We further  
250 examined the ability of the early summer (weeks 22- 27) and mid-summer (weeks 28- 33)  
251 average MIR to explain and predict the seasonal annual total WNV cases by using linear  
252 regression analysis. In addition, we assessed the ability of the cumulative positive mosquito  
253 pools up to week 28 and thereafter, added to each week's data, to find a threshold that could  
254 best explain the annual total human WNV cases. In both of these calculations, data from 2005  
255 to 2014 were used to create a regression equation, and data from 2015 and 2016 was used to  
256 test the model.

257 To visualize the spatial patterns of human illness over time, we first developed  
258 choropleth maps of WNV cases. Then, we used local Moran's I method using an inclusive  
259 second order queen contiguity weight matrix in the spatial analysis software GeoDa to further  
260 identify the spatial clusters of cumulative human WNV cases from 2005 to 2016. We also

261 examined differences in results using neighboring cells and rook contiguity weight matrix,  
262 but the results did not vary.

263 For the spatiotemporal statistical model, the outcome variable was the presence/  
264 absence of a human WNV case in each hexagon for each year and week. The predictors  
265 included 32 variables related to weather, land cover, mosquito infection and demography  
266 (Table 1). The weather variables consisted of mean weekly temperature and precipitation  
267 with lags of one to four weeks. The land cover variables include 15 categories, the proportion  
268 for each hexagon of: developed open space; developed low, medium, and high intensity  
269 urban areas; deciduous, evergreen, and mixed forests; barren land; shrubs; grassland; pasture;  
270 cultivated crops; woody wetlands; herbaceous wetlands; and open water. The mosquito  
271 infection data included the average MIR with lags of one to four weeks for each hexagon for  
272 each year and week. Demographic variables for each hexagon included the proportion of  
273 White, African American, Asian, and Hispanic population and the average median household  
274 income. In total, there were 1.44 million rows of data (5017 hexagons \* 12 years \* 24  
275 weeks). A correlation matrix among all variables was created to evaluate multicollinearity  
276 before running the model. As our response variable was binary (presence or absence of WNV  
277 human cases), we used mixed effects multiple logistic regression with stepwise selection for  
278 the statistical analysis, with hexagons as a random variable. We used the PROC GLIMMIX  
279 procedure in the SAS statistical software. An Akaike information criterion (AIC) was used to  
280 choose the best model [41]. A receiver operating characteristics (ROC) curve was calculated  
281 using model predictions for 2015 and 2016 to evaluate model performance. All the statistical  
282 analyses were conducted in SAS 9.4 (SAS Institute Inc., Cary).

283

284 Table 1. List of explanatory variables.

| <b>Variables</b>                            | <b>Notation</b> |
|---------------------------------------------|-----------------|
| <b><i>Land cover</i></b>                    |                 |
| Proportion of developed open space          | dospct          |
| Proportion of developed low intensity       | dlipct          |
| Proportion of developed medium intensity    | dmipct          |
| Proportion of developed high intensity      | dhipct          |
| Proportion of deciduous forests             | dfpct           |
| Proportion of evergreen forests             | efpct           |
| Proportion of mixed forests                 | mfpct           |
| Proportion of barren land                   | blpct           |
| Proportion of shrubs                        | shrubspct       |
| Proportion of grassland                     | glandpct        |
| Proportion of pasture                       | pasturepct      |
| Proportion of cultivated land               | clpct           |
| Proportion of woody wetlands                | wwpct           |
| Proportion of herbaceous wetlands           | hwpct           |
| Proportion of open water                    | owpct           |
| <b><i>Mosquito infection rate</i></b>       |                 |
| Mosquito infection of one week before       | mirlag1         |
| Mosquito infection of two weeks before      | mirlag2         |
| Mosquito infection of three weeks before    | mirlag3         |
| Mosquito infection of four weeks before     | mirlag4         |
| <b><i>Weather</i></b>                       |                 |
| <b><i>Temperature</i></b>                   |                 |
| Average temperature of one week before      | templag1        |
| Average temperature of two weeks before     | templag2        |
| Average temperature of three weeks before   | templag3        |
| Average temperature of four weeks before    | templag4        |
| <b><i>Precipitation</i></b>                 |                 |
| Average precipitation of one week before    | precilag1       |
| Average precipitation of two weeks before   | precilag2       |
| Average precipitation of three weeks before | precilag3       |
| Average precipitation of four weeks before  | precilag4       |
| <b><i>Demographic factors</i></b>           |                 |
| Percentage of White population              | whitepct        |
| Percentage of African American              | blackpct        |
| Percentage of Asian population              | asianpct        |
| Percentage of Hispanic                      | hispanicpct     |
| Median household income                     | income          |

285

286 **Results**

287 There were 1,371 total human WNV cases reported in Illinois from 2005 to 2016. Out

288 of these total reported cases, 906 cases (66%) were from the Chicago region (Cook and

289 DuPage Counties). The number of human WNV cases in the study region varied annually,  
 290 with the year 2012 reporting the highest number of cases (229) and the lowest number of  
 291 cases (1) reported in 2009 (Table 2). The average annual MIR during the mosquito season  
 292 was also highest in 2012 (7.34), with 31.3% of tested pools positive for WNV (Table 2). The  
 293 number of mosquito pools tested annually ranged from about 6,000 pools in 2016 to over  
 294 12,000 pools in 2007.

295

296 Table 2. Annual human WNV cases, average seasonal mosquito infection rate (MIR), and  
 297 mosquito testing from 2005 to 2016 in Cook and DuPage counties.

| Year | Number of human cases | Average MIR | Number of pools tested | Number of positive pools | Total number of mosquitoes tested |
|------|-----------------------|-------------|------------------------|--------------------------|-----------------------------------|
| 2005 | 181                   | 5.33        | 7,165                  | 1,939                    | 271,235                           |
| 2006 | 129                   | 5.35        | 9,428                  | 1,984                    | 318,386                           |
| 2007 | 43                    | 2.65        | 12,131                 | 1,259                    | 375,520                           |
| 2008 | 10                    | 1.91        | 9,024                  | 587                      | 298,995                           |
| 2009 | 1                     | 1.14        | 9,450                  | 298                      | 311,220                           |
| 2010 | 47                    | 5.19        | 11,491                 | 2,086                    | 393,279                           |
| 2011 | 24                    | 3.10        | 8,911                  | 939                      | 287,774                           |
| 2012 | 229                   | 7.35        | 10,162                 | 3,182                    | 323,497                           |
| 2013 | 66                    | 4.26        | 11,078                 | 1,967                    | 407,326                           |
| 2014 | 31                    | 2.97        | 9,273                  | 990                      | 333,489                           |
| 2015 | 36                    | 3.57        | 7,725                  | 1,046                    | 314,363                           |
| 2016 | 108                   | 6.34        | 6,144                  | 1,687                    | 219,909                           |

298 MIR= Mosquito infection rate; WNV= West Nile virus

299

300 We found a strong temporal relationship between the MIR of previous weeks and  
 301 human WNV cases in the study region (Table 3, Fig 1). The strongest correlation ( $r= 0.837$ )  
 302 was with MIR at a one-week lag (Table 3). The strength of the correlation was stronger ( $r=$   
 303  $0.884$ ) in the subset of high infection years (2005, 2006, 2012, and 2016) and relatively lower  
 304 ( $r= 0.737$ ) in low years (Table 3). When evaluated for only 2012, when case counts were  
 305 highest, the correlation between MIR and human WNV cases was also the highest ( $r= 0.899$ ).

306 In both high and low years, the strength of the correlation gradually declined with the number  
 307 of weeks lagged and there was almost no correlation with MIR after lags of four weeks.

308

309

310 Table 3. Spearman correlation of weekly cumulative human WNV cases and lagged MIR  
 311 for all years and selected subsets of years from 2005- 2016 in Cook and DuPage Counties.

| MIR                | Years with Human WNV cases |       |       |                 |
|--------------------|----------------------------|-------|-------|-----------------|
|                    | All years                  | >100  | <100  | 229 (Year 2012) |
| Same week          | 0.776                      | 0.775 | 0.671 | 0.818           |
| One week before    | 0.837                      | 0.884 | 0.737 | 0.899           |
| Two weeks before   | 0.765                      | 0.766 | 0.698 | 0.875           |
| Three weeks before | 0.601                      | 0.574 | 0.556 | 0.727           |
| Four weeks before  | 0.429                      | 0.354 | 0.394 | 0.501           |
| Five weeks before  | 0.289                      | 0.147 | 0.286 | 0.283           |
| Six weeks before   | 0.142                      | 0.001 | 0.120 | 0.038           |

312 MIR= Mosquito infection rate; WNV= West Nile virus

313

314 Fig 1. Cumulative weekly human WNV cases (red bars) and mosquito infection rate (blue  
 315 line) from 2005- 2016 in Cook and DuPage Counties, Illinois.

316

317 We found that the MIR of mid-summer (weeks 28-33) was able to explain 93% of the  
 318 variability in total annual human cases (Table 4, Fig 2). The model predicted 44.8 human  
 319 cases for 2015, compared to 35 actual cases, and 142.7 human cases for 2016 compared to  
 320 108 actual cases. Likewise, the cumulative number of positive pools also strongly explained  
 321 and predicted the total annual human cases (Table 4, Fig 3); the cumulative number of  
 322 positive mosquito pools by week 31 explained 93% of the variability in total annual human  
 323 cases, similar to that explained by mid-summer MIR (Table 4). The model using cumulative  
 324 positive pools by week 31 predicted 35.1 human cases (vs. 35 actual cases) for 2015 and  
 325 102.8 human cases (vs. 108 actual cases) for 2016. The cumulative mosquito positive pools  
 326 by week 31 thus better predicted the annual human cases than the mid-summer MIR.



327

328 Table 4. The regression equations of the relationship between a cumulative number of WNV  
329 positive pools, mosquito infection rate in a six-week period early and mid-summer and  
330 human West Nile virus illnesses for the year for Cook and DuPage Counties from 2004-  
331 2014.

| Week                  | Regression equation                                 | R-square |
|-----------------------|-----------------------------------------------------|----------|
| 28                    | $30.1 + 0.445 * \text{Number of positive pools}$    | 0.721    |
| 29                    | $21.2 + 0.278 * \text{Number of positive pools}$    | 0.825    |
| 30                    | $11.8 + 0.194 * \text{Number of positive pools}$    | 0.895    |
| 31                    | $2.33 + 0.144 * \text{Number of positive pools}$    | 0.931    |
| 32                    | $- 6.0 + 0.118 * \text{Number of positive pools}$   | 0.917    |
| 33                    | $- 16.5 + 0.103 * \text{Number of positive pools}$  | 0.901    |
| 34                    | $- 23.7 + 0.0938 * \text{Number of positive pools}$ | 0.863    |
| 35                    | $- 29.5 + 0.0861 * \text{Number of positive pools}$ | 0.813    |
| Early summer (22- 27) | $13.7 + 162 * \text{average MIR of week 22- 27}$    | 0.833    |
| Mid-summer (28- 33)   | $- 16.7 + 14.7 * \text{average MIR of week 28- 33}$ | 0.936    |

332

333 Fig 2. The relationship between annual human WNV infections and mid-summer mosquito  
334 infection rate from 2005- 2014 in Cook and DuPage Counties, Illinois.

335

336 Fig 3. The relationship between annual human WNV infections and a cumulative number of  
337 WNV positive mosquito pools from 2005- 2014 in Cook and DuPage Counties, Illinois.

338

339 The spatial pattern of human WNV cases in Cook and DuPage counties showed that  
340 cases were distributed throughout most areas of the study region at some point during the  
341 study period, with some pockets of higher numbers of cases (Fig 4). Out of the total 5,345  
342 hexagons in the study area, 750 hexagons had experienced at least one case of human WNV  
343 case during the years 2005 to 2016. Cumulatively, 123 hexagons had more than one human  
344 WNV case, with the maximum number of cases in a hexagon being five (Fig 4). The local  
345 Moran’s I identified some spatial clusters of human WNV cases in Cook and DuPage

346 counties (Fig 5): 92 hexagons with higher numbers of cases were also near to others with  
347 higher numbers of cases.

348

349 Fig 4. The spatial distribution of the cumulative number of human WNV infections from  
350 2005- 2016 in Cook and DuPage Counties, Illinois.

351

352 Fig 5. The local Moran's I result showing the spatial clustering of cumulative human WNV  
353 infections from 2005- 2016 in Cook and DuPage Counties, Illinois.

354

355 The results of the mixed-effects regression analysis showed that temperature,  
356 precipitation, land cover, mosquito infection, and demographic characteristics are all  
357 associated with the probability of an area having a case of WNV human illness. The AIC  
358 criteria used to compare the 10 best competing models showed that a model consisting of 15  
359 variables that included temperature, MIR, land cover, and demographic characteristics was  
360 the best model (Table 5). The final multivariable model indicated that higher temperatures  
361 two, three, and four weeks earlier and warmer average January temperature were associated  
362 with a higher probability of a hexagon being positive for human WNV case (Table 6). The  
363 lagged mosquito infection rates of one to four weeks earlier were also positively associated  
364 with the outcome variable (Table 6). Among the land cover variables, the proportion of open  
365 water, grassland, and deciduous forests were negatively associated with the probability of a  
366 WNV case while the proportion of low intensity developed areas was positively associated  
367 (Table 6). Among the demographic variable, total population was found to be positively  
368 associated with the probability of a WNV case, while the proportion of housing built after  
369 1990 was negatively associated (Table 6). The area under the ROC curve was 0.948, which  
370 indicates that model performance was excellent (Fig 6).

371

372 Table 5. Candidate models for predicting the probability of human WNV occurrence using  
 373 weather, land cover, mosquito infection, and demographic factors in Chicago region.

| Model | Variables included                                                                                                    | K  | -2 log likelihoods | AIC     | $\Delta$ AIC |
|-------|-----------------------------------------------------------------------------------------------------------------------|----|--------------------|---------|--------------|
| 1     | Yr + templag2- 4 + precilag2 + mirlag1- 4 + whitepct + owpct + dmipct + dhipct                                        | 14 | 12480.5            | 12530.5 | 0            |
| 2     | Yr + templag2- 4 + precilag2 and 4 + mirlag1- 4 + whitepct + owpct + dmipct + dhipct                                  | 15 | 12484.1            | 12536.1 | 5.6          |
| 3     | Yr + templag2- 4 + mirlag1- 4 + whitepct + owpct + dmipct + dhipct                                                    | 13 | 12489.3            | 12537.3 | 6.8          |
| 4     | Yr + templag2- 4 + precilag2 + mirlag1- 4 + whitepct + dmipct + dhipct                                                | 13 | 12490.8            | 12538.8 | 8.3          |
| 5     | Yr + templag2- 4 + precilag2 and 4 + mirlag1- 4 + whitepct + income + owpct + dmipct + dhipct                         | 16 | 12488.7            | 12542.7 | 12.2         |
| 6     | Yr + templag1- 4 + precilag2 and 4 + mirlag1- 4 + income + whitepct + owpct + dmipct + dhipct                         | 17 | 12503.5            | 12559.5 | 29           |
| 7     | Yr + templag1- 4 + precilag1-2 and 4 + mirlag1- 4 + income + whitepct + owpct + dmipct + dhipct                       | 18 | 12502.6            | 12560.6 | 30.1         |
| 8     | Yr + templag1- 4 + precilag1- 4 + mirlag1- 4 + income + whitepct + owpct + dmipct + dhipct + mfpct + glandpct + wwpct | 22 | 12502.6            | 12560.6 | 30.1         |
| 9     | Global model (all predictor variable included)                                                                        | 33 | 12476.47           | 12566.5 | 36           |
| 10    | Null model                                                                                                            | 1  | 14210.7            | 14214.7 | 1684.2       |

374

375

376 Table 6. Model parameters for the best model using weather, land cover, mosquito infection,  
 377 and demographic factors to predict the occurrence of WNV human cases in Chicago region.

| Variable                                      | Parameter estimate | F-value        | P-Value | Odds ratio (95% CI)     |
|-----------------------------------------------|--------------------|----------------|---------|-------------------------|
| Fixed effects                                 |                    |                |         |                         |
| Year                                          | -                  | 17.33          | <0.001  | -                       |
| Temperature of two weeks before               | 0.06963            | 22.36          | <0.001  | 1.08<br>(1.049 -1.112)  |
| Temperature of three weeks before             | 0.1085             | 42.99          | <0.001  | 1.128<br>(1.092- 1.165) |
| Temperature of four weeks before              | 0.1628             | 116.47         | <0.001  | 1.197<br>(1.162- 1.234) |
| Average January temperature                   | 0.3613             | 16.65          | <0.001  |                         |
| Mosquito infection rate of one week before    | 0.003199           | 21.53          | <0.001  | 1.003<br>(1.002- 1.004) |
| Mosquito infection rate of two weeks before   | 0.003938           | 38.79          | <0.001  | 1.004<br>(1.002- 1.005) |
| Mosquito infection rate of three weeks before | 0.004003           | 37.83          | <0.001  | 1.004<br>(1.002- 1.005) |
| Mosquito infection rate of four weeks before  | 0.003958           | 34.63          | <0.001  | 1.004<br>(1.002- 1.005) |
| Total population                              | 0.000225           | Infinity       | <0.001  | 1.009<br>(1.006- 1.012) |
| Open water percentage                         | -0.05527           | 9.58           | 0.002   | 0.954<br>(0.921- 0.988) |
| Developed light intensity percentage          | 0.01848            | 80.65          | <0.001  | 0.990<br>(0.985- 0.994) |
| Deciduous forest percentage                   | -0.02401           | 4.66           | 0.0309  | 0.985<br>(0.980- 0.991) |
| Grassland percentage                          | -0.04603           | 3.14           | 0.0763  |                         |
| Post 1990 built housing percentage            | -0.00546           | 4.28           | 0.0386  |                         |
| Random effect                                 |                    |                |         |                         |
| Subject                                       | Estimate           | Standard error | Z-value | P-value                 |
| Hexagon ID                                    | 1.1769             | 0.1636         | 7.19    | <0.0001                 |

378

379

380 Fig 6. The receiver operating characteristics (ROC) curve for the final model.

381

382 **Discussion**

383           We identified important fine-scale drivers of spatiotemporal variability in the human  
384 WNV cases in Chicago region, Illinois, an area of ongoing WNV transmission. Our analysis  
385 used long-term data on human illness, mosquito surveillance, weather, landscape, and  
386 demographic data. We found significant spatial clusters of human WNV cases within this  
387 urban environment. We also found a strong correlation between the weekly MIR of earlier  
388 weeks and weekly human WNV cases, and further developed predictive temporal models  
389 using mid-summer average MIR and cumulative positive mosquito pools which can be used  
390 to estimate the total annual human WNV cases.

391           The temporal variation in the weekly human WNV cases was strongly correlated with  
392 MIR of one to four weeks earlier, with a correlation of one week earlier being the strongest.  
393 This finding was similar to our earlier model based on Illinois climate divisions, in which  
394 Division 2 includes our current study area [42]. The similarity in the correlation may be due  
395 to the fact that the data for Climate Division 2 were dominated by the data from Cook and  
396 DuPage, as these counties have more intensive surveillance compared to other Illinois  
397 counties. However, similar observations were also found in Ontario, Canada, where MIR of  
398 one week earlier was most strongly correlated with the weekly variation in human WNV  
399 cases [16]. In our study, we also found that the correlations between weekly MIR and human  
400 cases increased in high WNV years, which was also observed in a study conducted in Long  
401 Island, New York [18]. This is understandable, as stochastic variability decreases with  
402 increased numbers of cases, allowing for more precise estimation.

403           The temporal models we developed using mid-summer average MIR and cumulative  
404 mosquito positive pools were both able to explain more than 90% of the variability in the  
405 annual number of human cases. This similarity of the results was not surprising, as positive  
406 mosquito pools are used to calculate the MIR. However, the cumulative positive pools up to  
407 week 31 better predicted the annual human cases compared to mid-summer average MIR for

408 2015 and 2016. The difference observed between the two approaches may reflect the  
409 variability of the MIR calculation depending on the mosquito pool size [43,44]. Taking the  
410 most extreme possibility, when there was only one mosquito in a pool and it tested positive,  
411 this would yield a MIR of 1000 in contrast to MIR of 20 when a pool with 50 mosquitoes was  
412 tested positive. In Ontario, Canada, the cumulative number of positive mosquito pools up to  
413 week 34 was suggested as an action threshold potential to estimate the total annual human  
414 cases [16]. In Chicago, we obtained this signal three weeks earlier, which can be crucial to  
415 the ability to intervene in the upcoming potential human WNV outbreak.

416         We found spatial clustering of human WNV cases within the study area, indicating  
417 that some areas were more likely than others to have a WNV human case. A spatial clustering  
418 pattern of human WNV cases in Chicago area was also observed in the 2002 WNV outbreak  
419 year [12]. Several factors might play a role in the observed spatial clustering pattern,  
420 including differences in the fine-scale variation in the local landscape structure that affects  
421 mosquito population, fine-scale weather variation, demographic characteristics, access of  
422 people to health care system, and spatially variable mosquito abatement practices  
423 [12,39,45,46].

424         In this study, through multilevel modeling, we identified several dynamic factors that  
425 are possibly driving the fine scale spatiotemporal variation in the human WNV cases  
426 occurrence in the Chicago region. We found that the higher temperature in the previous  
427 weeks increases the probability of an area being positive for a WNV case. The association  
428 between higher temperature and WNV human illness has also been observed in other studies  
429 conducted at different spatial scales [15,17,20]. This is possibly due to the dynamic effect of  
430 higher temperature on mosquito breeding and virus replication [35,47–49]. The unique  
431 feature of our study is that by considering the dynamic nature of weather, we allowed the  
432 temperature and precipitation to vary both temporally and spatially to capture the better role

433 of weather in the spatiotemporal variability of human WNV cases. The precipitation of earlier  
434 weeks was not as important as the temperature of the preceding weeks but still was  
435 moderately important. The negative association of precipitation observed indicated that dry  
436 and hot weather conditions would increase the probability of an area being positive for a  
437 WNV case. Some other studies have also indicated that hot dry weather conditions are  
438 conducive for WNV transmission [50,51]. While it may seem counter-intuitive that the  
439 proportion of open water was negatively correlated with WNV cases, given *Culex*  
440 populations would increase with an increase in breeding sites, the definition of open water  
441 (areas in which any aquatic vegetation is submerged) is such that it is unlikely to provide  
442 good breeding habitat for *Culex*.

443 We also found increased MIR up to four weeks earlier will increase the probability of  
444 an area being positive for a WNV human case. The temporal association between lagged  
445 MIR and human WNV cases is relatively well established [10,16,52]. However, it was  
446 interesting to find the positive association of MIR when spatiotemporal variabilities of human  
447 cases were considered. In our current analysis, we found that areas with a higher percentage  
448 of white population had a higher probability of being positive for WNV, which has also been  
449 observed in a previous study of this [12]. This may be a function of access to the health care  
450 system and likelihood of seeking medical treatment and testing [12,27], or may simply be due  
451 to high proportions of white population in areas of the study region where environmental  
452 conditions are also conducive to increased mosquito activity.

453 This study also found that the probability of a hexagon being a positive for WNV case  
454 decreased in developed medium and high-intensity urban areas and increased in developed  
455 low-intensity urban areas, indicating that the suburban areas of Chicago are more at risk than  
456 the highly developed urban centers. The lack of mosquito breeding grounds and bird activity  
457 in the high-intensity urban areas might be responsible for this. Previous studies conducted in

458 the same area have also indicated that sub-urban region in Chicago is at more risk from the  
459 WNV [12,27]. This is probably due to the poor sanitation system in the older houses  
460 compared to new houses.

461 In this study, we did not consider prior seasonal differences in the weather conditions,  
462 which we recommend be incorporated in future studies. In addition, the calculation of MIR  
463 for hexagons may be biased as the IDW interpolation technique used to develop continuous  
464 surface maps is affected by the uneven distribution of mosquito traps across the study area.  
465 Alternatively, other interpolation methods such as kriging might be used to develop  
466 continuous surface maps for MIR, as this method takes into account spatial autocorrelation  
467 and also creates an error map. In this study, we did not distinguish between neuroinvasive  
468 and non-neuroinvasive WNV cases. Separate analysis for only neuroinvasive cases might  
469 help us to identify what conditions drive the occurrence of the severe form of WNV infection  
470 and should also help to reduce diagnostic bias. Also, in future studies, we might consider  
471 using different spatial scales to identify if the geographic scale has affected the results. We  
472 were also unable to use data from avian or equid surveillance in this study, despite its  
473 usefulness in other modeling approaches [53–55], due to the lack of consistent data across the  
474 time period. Bird surveillance in Illinois is limited to passive surveillance of a small number  
475 of dead birds tested in each county per year, and is generally suspended after WNV is known  
476 to be circulating in the area, while equid surveillance is based entirely on passive self-  
477 reporting [56]. This lack of consistent data on avian mortality has been noticed by others  
478 [10], and remains an issue for the use of data on the primary host in WNV forecasting.

479 In conclusion, our analysis helped to better understand the fine-scale dynamic drivers  
480 of WNV transmission in an urban environment. The dynamic interplay between temperature  
481 and precipitation, mosquito infection, land cover, and demographic characteristics determine  
482 the probability of an area having a WNV case or not. Additionally, we established an



483 important temporal relationship between cumulative mosquito positive pools and mid-  
484 summer average MIR with the total annual human WNV cases. This information can be used  
485 as a guideline to develop a threshold for public health intervention.

486

## 487 **ACKNOWLEDGEMENTS**

488 This publication was supported by Cooperative Agreement #U01 CK000505, funded by the  
489 Centers for Disease Control and Prevention. Its contents are solely the responsibility of the  
490 authors and do not necessarily represent the official views of the Centers of Disease Control  
491 and Prevention or the Department of Health and Human Services.

492

## 493 **REFERENCES**

- 494 1. Lanciotti R, Roehrig J, Deubel V, Smith J, Parker M, Steele K, et al. Origin of the  
495 West Nile virus responsible for an outbreak of encephalitis in the northeastern United  
496 States. *Science* (80- ). 1999;286: 2333–2337.
- 497 2. Kilpatrick AM, LaDeau SL, Marra PP. Ecology of West Nile virus transmission and its  
498 impact on birds in the western hemisphere. *Auk*. 2007;124: 1121–1136.
- 499 3. Hamer GL, Kitron UD, Brawn JD, Loss SR, Ruiz MO, Goldberg TL, et al. **Culex**  
500 **pipiens** (Diptera: Culicidae): a bridge vector of West Nile virus to humans. *J Med*  
501 *Entomol*. 2008;45: 125–128.
- 502 4. Hamer GL, Walker ED, Brawn JD, Loss SR, Ruiz MO, Goldberg TL, et al. Rapid  
503 amplification of West Nile virus: the role of hatch-year birds. *Vector borne zoonotic*  
504 *Dis*. 2008;8: 57–68.
- 505 5. Hayes EB, Gubler DJ. West Nile virus: Epidemiology and clinical features of an  
506 emerging epidemic in the United States. *Annu Rev Med*. 2006;57: 181–194.
- 507 6. Brault AC. Changing patterns of West Nile virus transmission: altered vector  
508 competence and host susceptibility. *Vet Res*. 2009;40: 1–19.
- 509 7. Centers for Disease Control and Prevention (CDC). West Nile virus [Internet]. 2017  
510 [cited 15 Oct 2016]. Available: <https://www.cdc.gov/westnile/statsmaps/final.html>
- 511 8. Marfin AA, Petersen LR, Eidson M, Miller J, Hadler J, Farello C, et al. Widespread  
512 West Nile virus activity, eastern United States, 2000. *Emerg Infect Dis*. 2000;7: 730.
- 513 9. Lindsey NP, Staples JE, Lehman JA, Fischer M. Surveillance for human west nile  
514 virus disease - United states, 1999-2008. *MMWR Surveill Summ*. 2010;59: 1–17.
- 515 10. Kilpatrick AM, Pape WJ. Predicting human West Nile virus infections with mosquito  
516 surveillance data. *Am J Epidemiol*. 2013;178: 829–835.
- 517 11. Manore CA, Davis J, Christofferson RC, Wesson D, Hyman JM, Mores CN. Towards  
518 an early warning system for forecasting human West Nile virus incidence. *PLoS Curr*.  
519 2014;6.
- 520 12. Ruiz MO, Tedesco C, McTighe TJ, Austin C, Kitron U. Environmental and social  
521 determinants of human risk during a West Nile virus outbreak in the greater Chicago  
522 area, 2002. *Int J Health Geogr*. 2004;3: 8–18.

- 523 13. Roiz D, Ruiz S, Soriguer R, Figuerola J. Climatic effects on mosquito abundance in  
524 Mediterranean wetlands. *Parasit Vectors*. 2014;7: 333.
- 525 14. Rosa R, Marini G, Bolzoni L, Neteler M, Metz M, Delucchi L, et al. Early warning of  
526 West Nile virus mosquito vector: climate and land use models successfully explain  
527 phenology and abundance of *Culex pipiens* mosquitoes in north-western Italy.  
528 *Parasites Vectors* 7 1. 2014;1: 269–280.
- 529 15. Wimberly MC, Lamsal A, Giacomo P, Chuang T-W. **Regional Variation of Climatic  
530 Influences on West Nile Virus Outbreaks in the United States**. *Am J Trop Med Hyg*.  
531 2014;91: 677–684.
- 532 16. Giordano B V, Kaur S, Hunter FF. West Nile virus in Ontario Canada: A twelve-year  
533 analysis of human case prevalence, mosquito surveillance, and climate data. *PLoS*  
534 *One*. 2017;12.
- 535 17. Hahn MB, Monaghan AJ, Hayden MH, Eisen RJ, Delorey MJ, Lindsey NP, et al.  
536 Meteorological conditions associated with increased incidence of West Nile virus  
537 disease in the United States, 2004-2012. *Am J Trop Med Hyg*. 2015;92: 1013–1022.
- 538 18. Defelice NB, Little E, Campbell SR, Shaman J. Ensemble forecast of human West  
539 Nile virus cases and mosquito infection rates. *Nat Commun*. 2017;8: 1–6.  
540 doi:10.1038/ncomms14592
- 541 19. Chung WM, Buseman CM, Joyner SN, Hughes SM, Fomby TB, Luby JP, et al. **The  
542 2012 West Nile Encephalitis Epidemic in Dallas, Texas**. *JAMA*. 2013;8874: 297–307.  
543 doi:10.1001/jama.2013.8267
- 544 20. Tran A, Sudre B, Paz S, Rossi M, Desbrosse A, Chevalier V, et al. Environmental  
545 predictors of West Nile fever risk in Europe. *Int J Health Geogr*. 2014;13: 26–36.
- 546 21. Landesman WJ, Allan BF, Langerhans RB, Knight TM, Chase JM. Inter-annual  
547 associations between precipitation and human incidence of West Nile virus in the  
548 United States. *Vector borne zoonotic Dis*. 2007;7: 337–343.
- 549 22. Paull SH, Kilpatrick AM, Horton DE, Diffenbaugh NS, Ashfaq M, Rastogi D, et al.  
550 Drought and immunity determine the intensity of west nile virus epidemics and climate  
551 change impacts. *Proc R Soc B Biol Sci*. 2017;284. doi:10.1098/rspb.2016.2078
- 552 23. Chuang T-W, Hockett CW, Kightlinger L, Wimberly MC. Landscape-level spatial  
553 patterns of West Nile virus risk in the Northern Great Plains. *Am J Trop Med Hyg*.  
554 2012; 724–731.
- 555 24. Sallam MF, Michaels SR, Riegel C, Pereira RM, Zipperer W, Lockaby BG, et al.  
556 **Spatio-Temporal Distribution of Vector-Host Contact (VHC) Ratios and Ecological  
557 Niche Modeling of the West Nile Virus Mosquito Vector *Culex quinquefasciatus*, in  
558 the City of New Orleans, LA, USA**. *Int J Environ Res Public Health*. 2017;14: 892–  
559 911.
- 560 25. DeGroot JP, Sugumaran R. National and regional associations between human West  
561 Nile virus incidence and demographic landscape, and land use conditions in the  
562 coterminous United States. *Vector borne zoonotic Dis*. 2012;12: 657–665.
- 563 26. Liu H, Weng Q, Gaines D. Geographic incidence of human West Nile virus in  
564 northern Virginia USA, in relation to incidence in birds and variations in urban  
565 environment. *Sci Total Environ*. 2011;409: 4235–4241.
- 566 27. Ruiz M, Walker E, Foster E, Haramis L, Kitron U. Association of West Nile virus  
567 illness and urban landscapes in Chicago and Detroit. *Int J Health Geogr*. 2007;6: 10–  
568 20.
- 569 28. Brinton MA. Host factors involved in West Nile virus replication. *Ann N Y Acad Sci*.  
570 2001;951: 207–219.
- 571 29. Nolan MS, Schuermann J, Murray KO. West Nile virus infection among humans in

- 572 Texas, USA, 2002-2011. *Emerg Infect Dis*. 2013;19.1: 137.
- 573 30. Montgomery RR, Murray KO. Risk factors for West Nile virus infection and disease in  
574 populations and individuals. *Expert Rev Anti Infect Ther*. 2015;13: 317–325.
- 575 31. Davis JK, Vincent G, Hildreth MB, Kightlinger L, Carlson C, Wimberly MC.  
576 Integrating Environmental Monitoring and Mosquito Surveillance to Predict Vector-  
577 borne Disease: Prospective Forecasts of a West Nile Virus Outbreak. *PLoS Curr*. 2017;  
578 1–23. doi:10.1371/currents.outbreaks.90e80717c4e67e1a830f17feeaaf85de
- 579 32. Wimberly MC, Giacomo P, Kightlinger L, Hildreth MB. Spatio-temporal  
580 epidemiology of human West Nile virus disease in South Dakota. *Int J Environ Res*  
581 *Public Health*. 2013;10: 5584–5602.
- 582 33. DeGroot JP, Sugumaran R, Brend S, Tucker B, Bartholomay L. Landscape  
583 demographic, entomological, and climatic associations with human disease incidence  
584 of West Nile virus in the state of Iowa, USA. *Int J Health Geogr*. 2008;7: 19.
- 585 34. Kwan M-P. The uncertain geographic context problem. *Ann Assoc Am Geogr*.  
586 2012;102: 958–968.
- 587 35. Ruiz MO, Chaves LF, Hamer GL, Sun T, Brown WM, Walker ED, et al. Local impact  
588 of temperature and precipitation on West Nile virus infection in *Culex* species  
589 mosquitoes in northeast Illinois, USA. *Parasit Vectors*. 2010;3: 19–34.
- 590 36. Birch CP, Oom SP, Beecham JA. Rectangular and hexagonal grids used for  
591 observation, experiment and simulation in ecology. *Ecol Modell*. 2007;206: 347–359.
- 592 37. Potter KM, Koch FH, Oswalt CM, Iannone B V. Data data everywhere: detecting  
593 spatial patterns in fine-scale ecological information collected across a continent.  
594 *Landsc Ecol*. 2016;31: 67–84.
- 595 38. IDPH. West Nile Virus [Internet]. 2016 [cited 15 Jan 2017]. Available:  
596 <http://www.dph.illinois.gov/topics-services/diseases-and-conditions/west-nile-virus>
- 597 39. Messina JP, Brown W, Amore G, Kitron UD, Ruiz MO. West Nile virus in the Greater  
598 Chicago area: A geographic examination of human illness and risk from 2002 to 2006.  
599 *URISA J*. 2011;23: 5–22.
- 600 40. Biggerstaff BJ. PooledInfRate. Division of Vector-Borne and Infectious Diseases,  
601 CDC; 2004.
- 602 41. Akaike H. Stochastic Theory of Minimal Realization. *IEEE Trans Automat Contr*.  
603 1974;19: 667–674. doi:10.1109/TAC.1974.1100707
- 604 42. Karki S, Westcott N, Muturi E, Brown W, Ruiz M. Assessing human risk of illness  
605 with West Nile virus mosquito surveillance data to improve public health  
606 preparedness. *Zoonoses Public Health*. 2017;65: 177–184.
- 607 43. Gu W, Lampman R, Novak R. Assessment of arbovirus vector infection rates using  
608 variable size pooling. *Med Vet Entomol*. 2004;18: 200–204.
- 609 44. Gu W, Lampman R, Novak RJ. Problems in estimating mosquito infection rates using  
610 minimum infection rate. *J Med Entomol*. 2003;40: 595–596.
- 611 45. Tedesco C, Ruiz M, McLafferty S. Mosquito politics: local vector control policies and  
612 the spread of West Nile Virus in the Chicago region. *Heal Place*. 2010;16: 1188–1195.
- 613 46. Hamer GL, Chaves LF, Anderson TK, Kitron UD, Brawn JD, Ruiz MO, et al. Fine-  
614 scale variation in vector host use and force of infection drive localized patterns of West  
615 Nile virus transmission. *PLoS One*. 2011;6. doi:10.1371/journal.pone.0023767
- 616 47. Reisen WK, Fang Y, Martinez VM. Effects of temperature on the transmission of West  
617 Nile virus by *Culex tarsalis* (Diptera: Culicidae). *J Med Entomol*. 2006;43: 309–317.
- 618 48. Kilpatrick AM, Meola MA, Moudy RM, Kramer LD. Temperature, viral genetics, and  
619 the transmission of West Nile virus by *Culex pipiens* mosquitoes. *PLoS Pathog*.  
620 2008;4.

- 621 49. Shand L, Brown WM, Chaves LF, Goldberg TL, Hamer GL, Haramis L, et al.  
622 Predicting West Nile Virus Infection Risk From the Synergistic Effects of Rainfall and  
623 Temperature. *J Med Entomol*. 2016;53: 935–944. doi:10.1093/jme/tjw042
- 624 50. Epstein PR. Climate change and emerging infectious diseases. *Microbes Infect*.  
625 2001;3: 747–754. Available:  
626 [http://www.ncbi.nlm.nih.gov/sites/entrez?Db=pubmed&DbFrom=pubmed&Cmd=Link&LinkName=pubmed\\_pubmed&LinkReadableName=Related](http://www.ncbi.nlm.nih.gov/sites/entrez?Db=pubmed&DbFrom=pubmed&Cmd=Link&LinkName=pubmed_pubmed&LinkReadableName=RelatedArticles&IdsFromResult=11489423&ordinalpos=3&itool=EntrezSystem2.PEntrez.Pubmed.Pubmed_ResultsPanel.Pubmed_RVDocSum)  
627 [Articles&IdsFromResult=11489423&ordinalpos=3&itool=EntrezSystem2.PEntrez.Pu](http://www.ncbi.nlm.nih.gov/sites/entrez?Db=pubmed&DbFrom=pubmed&Cmd=Link&LinkName=pubmed_pubmed&LinkReadableName=RelatedArticles&IdsFromResult=11489423&ordinalpos=3&itool=EntrezSystem2.PEntrez.Pubmed.Pubmed_ResultsPanel.Pubmed_RVDocSum)  
628 [bmed.Pubmed\\_ResultsPanel.Pubmed\\_RVDocSum](http://www.ncbi.nlm.nih.gov/sites/entrez?Db=pubmed&DbFrom=pubmed&Cmd=Link&LinkName=pubmed_pubmed&LinkReadableName=RelatedArticles&IdsFromResult=11489423&ordinalpos=3&itool=EntrezSystem2.PEntrez.Pubmed.Pubmed_ResultsPanel.Pubmed_RVDocSum)  
629
- 630 51. Morin CW, Comrie AC. Regional and seasonal response of a West Nile virus vector to  
631 climate change. *Proc Natl Acad Sci U S A*. 2013;11: 15620–15625.
- 632 52. Mulatti P, Ferguson HM, Bonfanti L, Montarsi F, Capelli G, Marangon S.  
633 Determinants of the population growth of the West Nile virus mosquito vector **Culex**  
634 **pipiens** in a repeatedly affected area in Italy. *Parasit Vectors*. 2014;7.1: 26.
- 635 53. Johnson GD, Eidson M, Schmit K, Ellis A, Kulldorff M. Geographic prediction of  
636 human onset of West Nile virus using dead crow clusters: An evaluation of year 2002  
637 data in New York State. *Am J Epidemiol*. 2006;163: 171–180. doi:10.1093/aje/kwj023
- 638 54. Valiakos G, Papaspyropoulos K, Giannakopoulos A, Birtsas P, Tsiodras S, Hutchings  
639 MR, et al. Use of wild bird surveillance, human case data and GIS spatial analysis for  
640 predicting spatial distributions of West Nile virus in Greece. *PLoS One*. 2014;9.  
641 doi:10.1371/journal.pone.0096935
- 642 55. Roberts RS, Foppa IM. **Prediction of Equine Risk of West Nile Virus Infection Based**  
643 **on Dead Bird Surveillance**. *Vector-Borne Zoonotic Dis*. 2006;6: 1–6.  
644 doi:10.1089/vbz.2006.6.1
- 645 56. Illinois Department of Public Health. West Nile Virus [Internet]. 2020. Available:  
646 <http://www.dph.illinois.gov/topics-services/diseases-and-conditions/west-nile-virus>  
647  
648

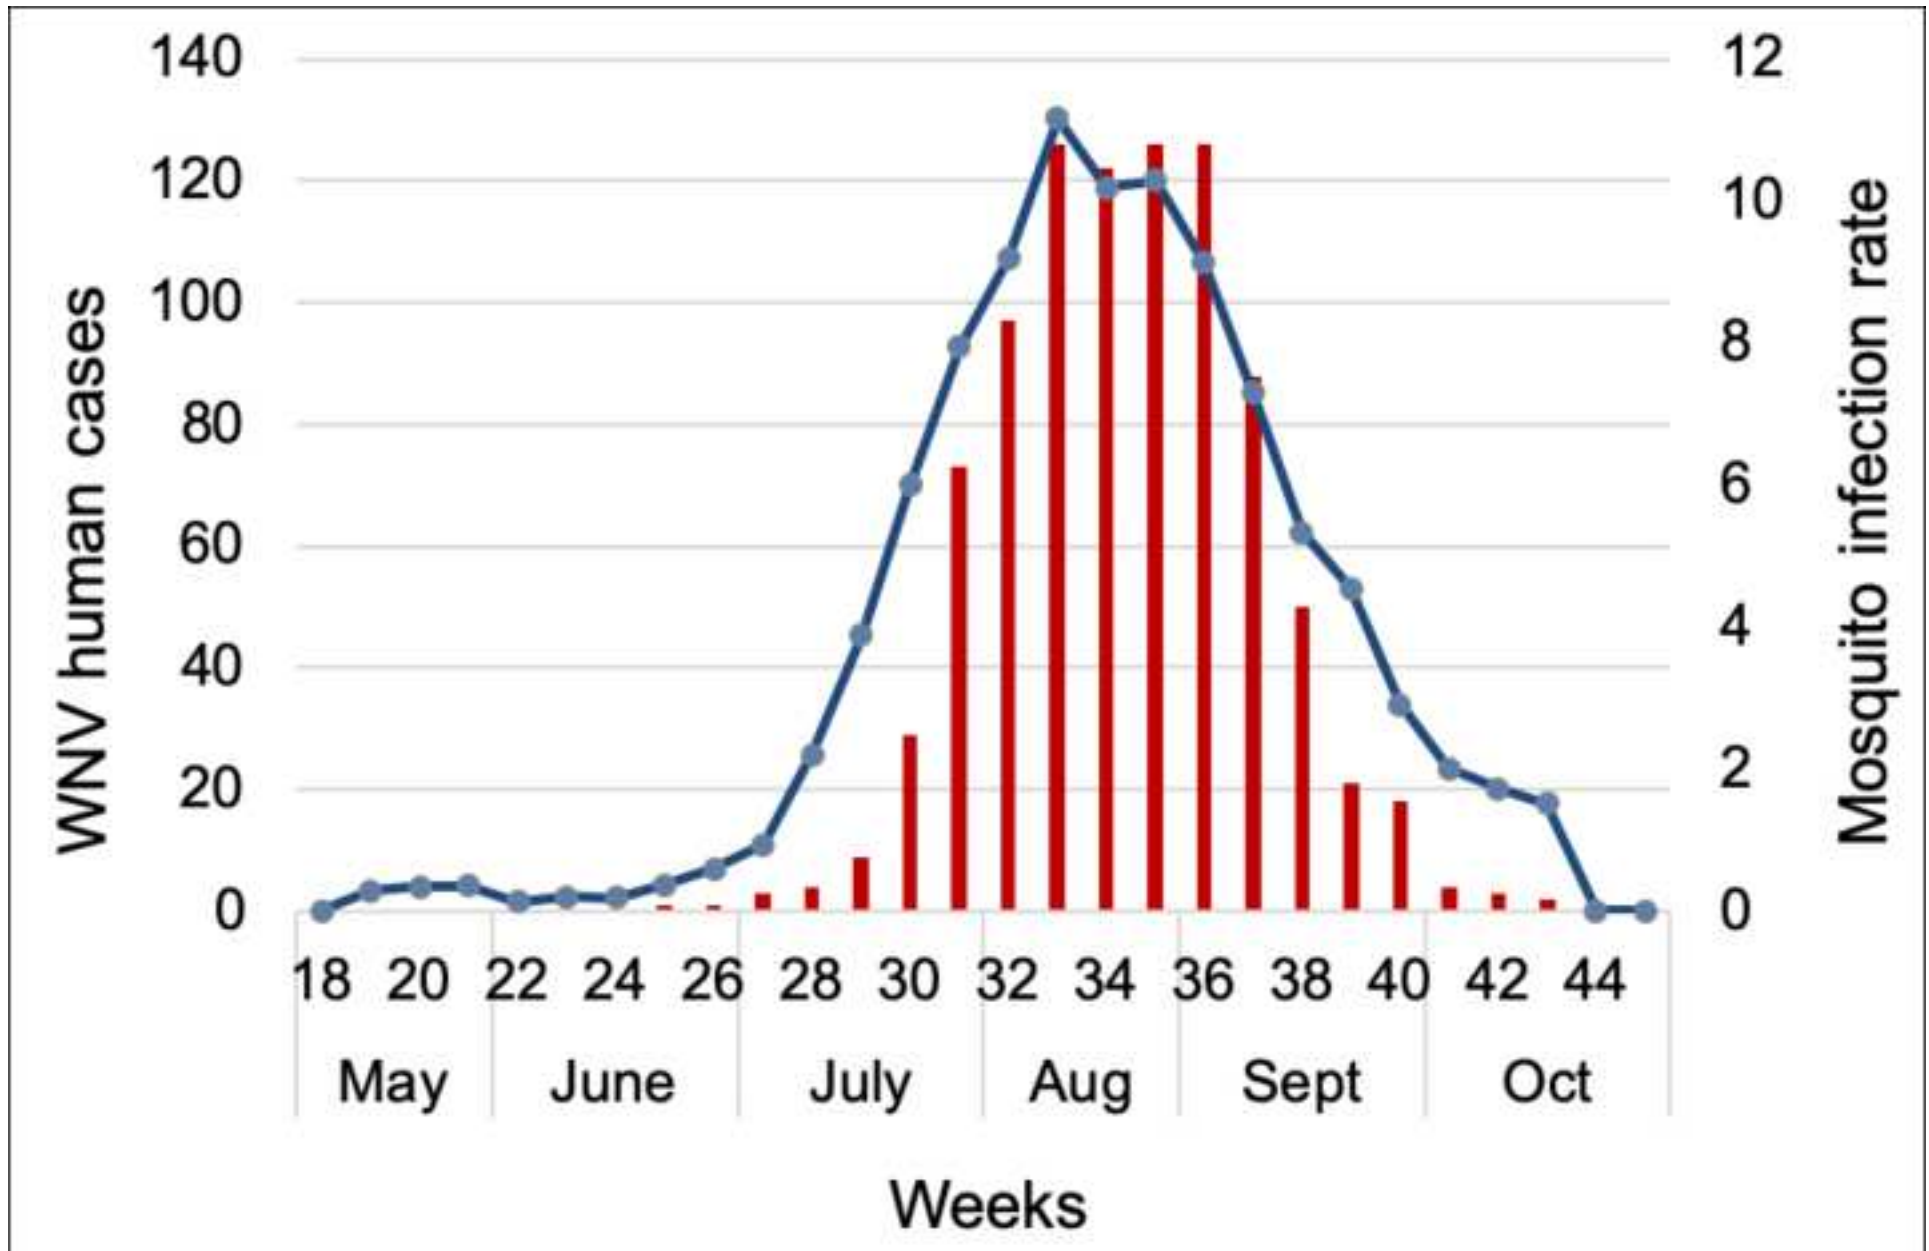

Figure 2

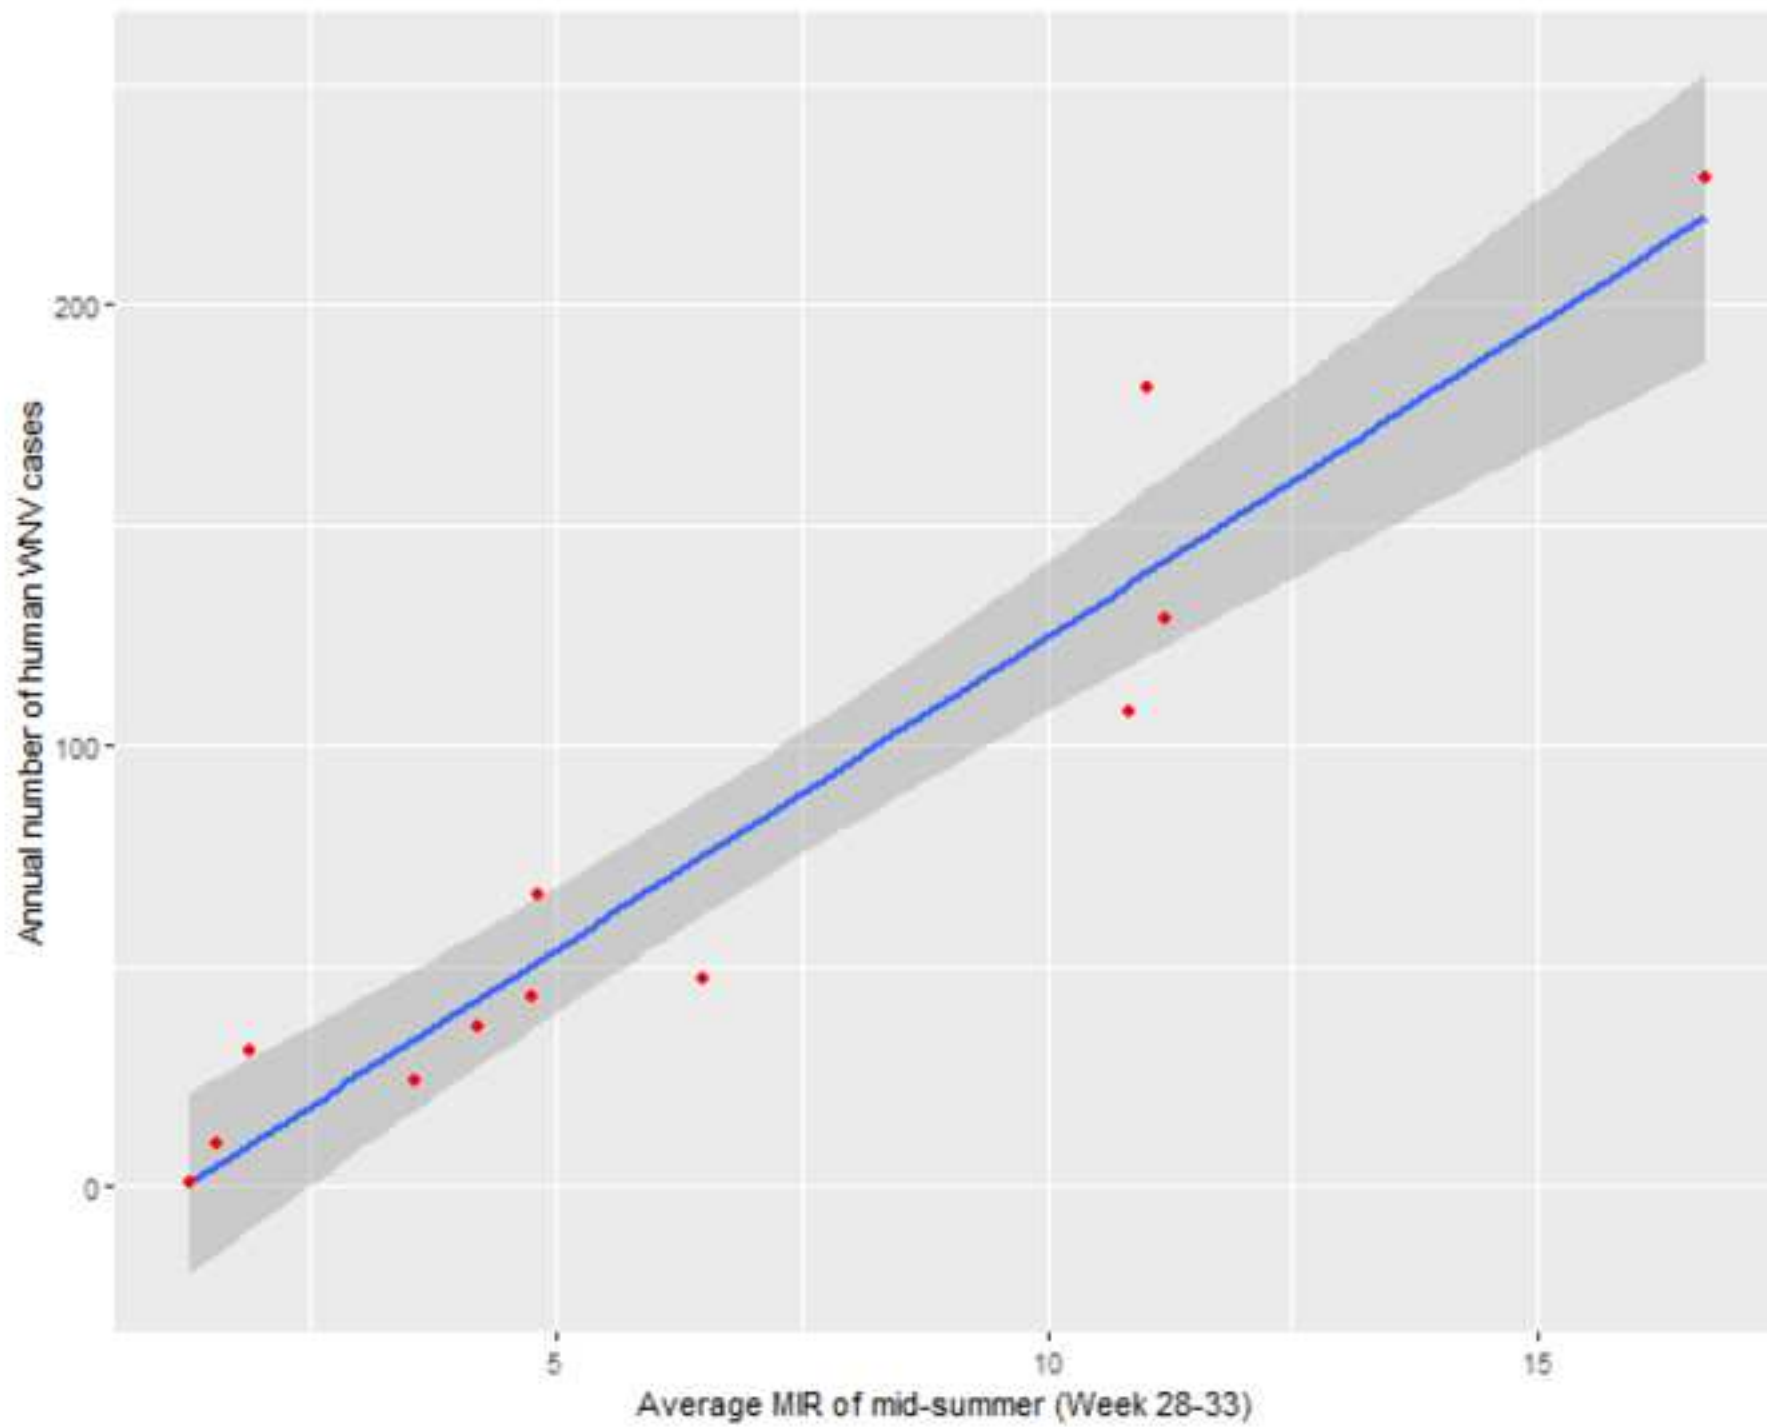

Figure 3

[Click here to access/download;Figure;Fig3.tif](#)

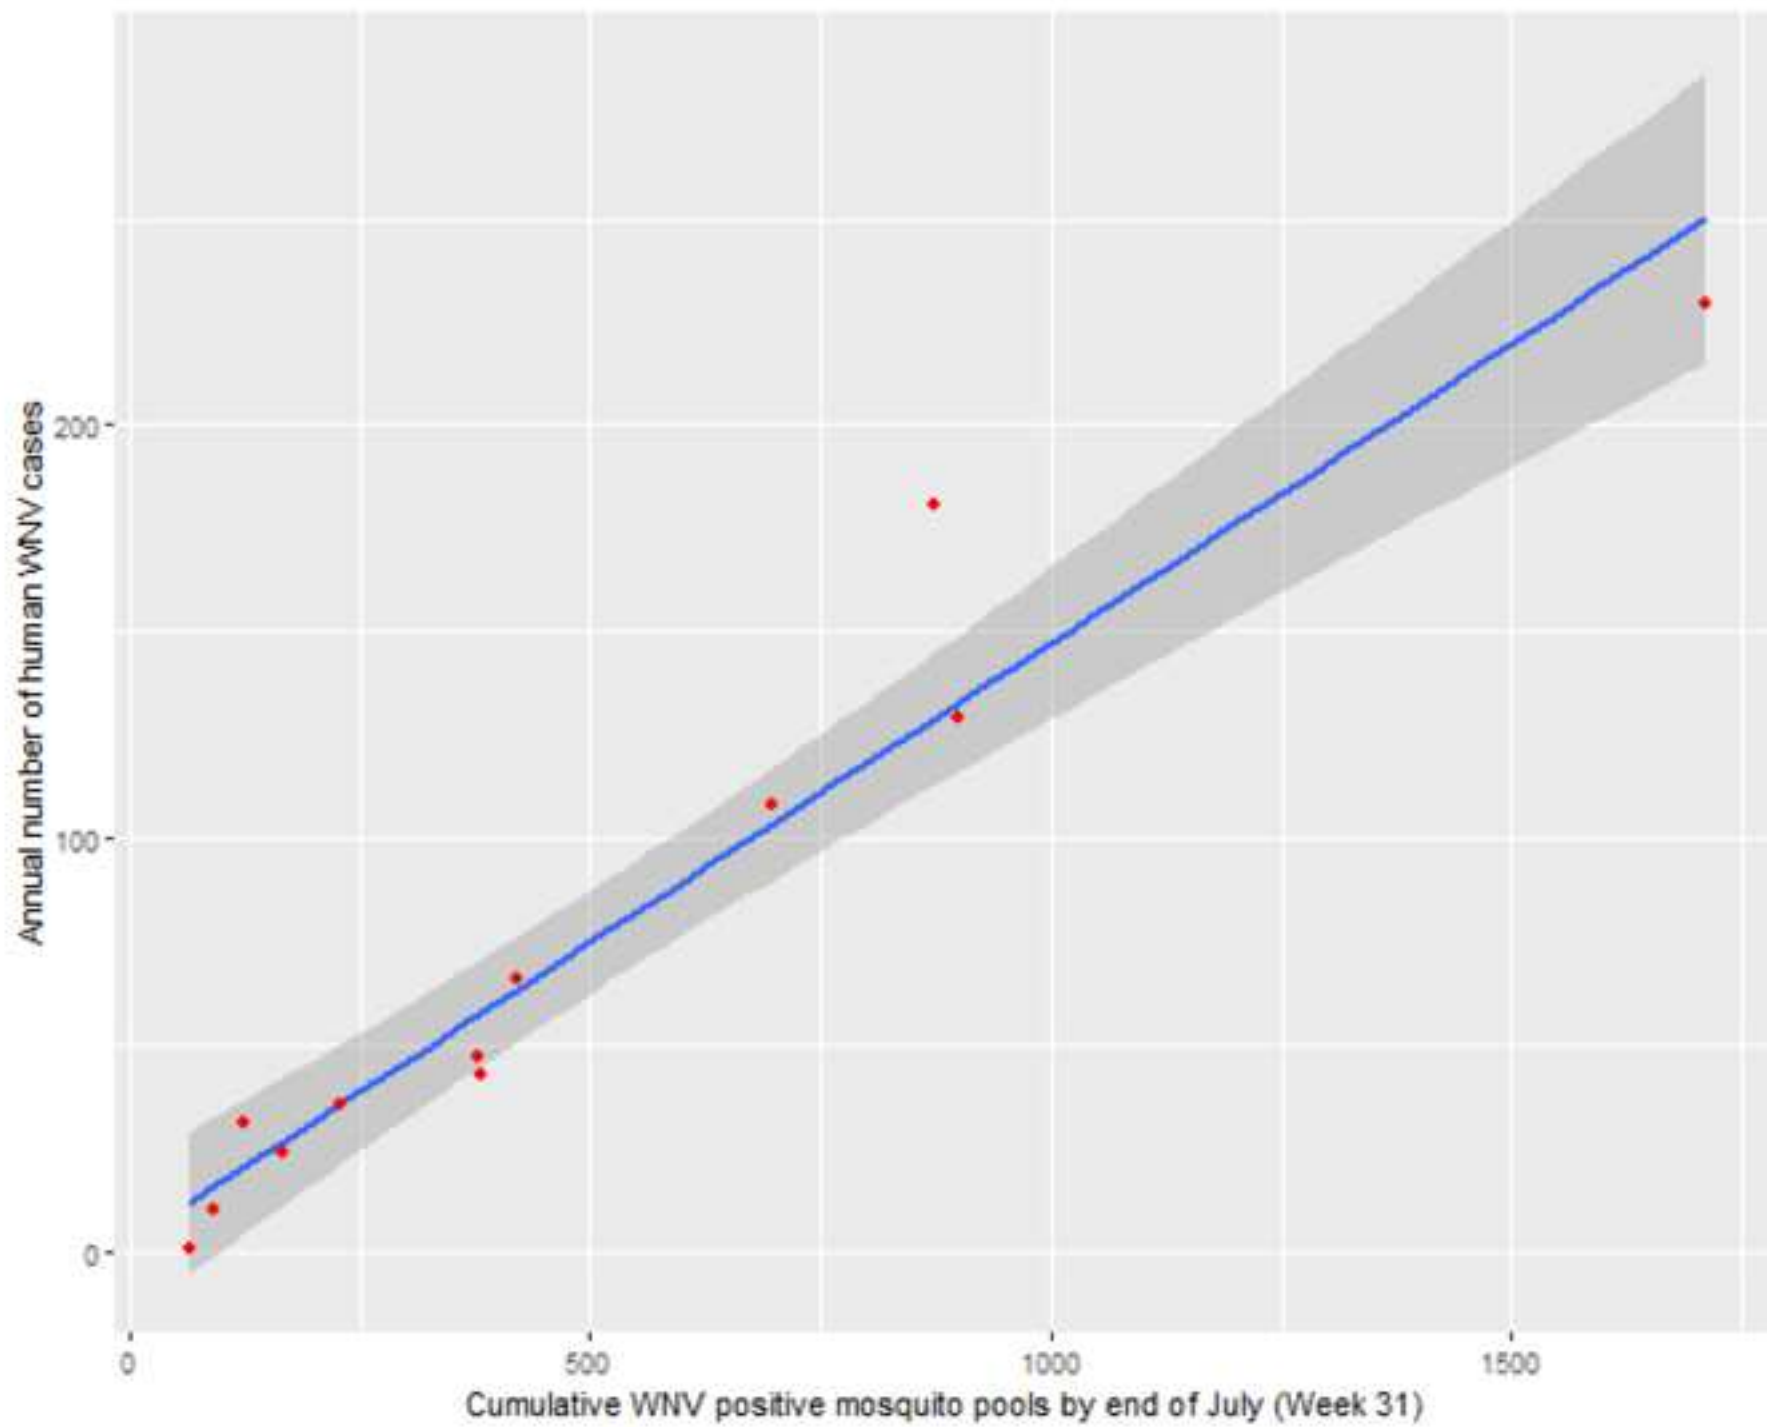

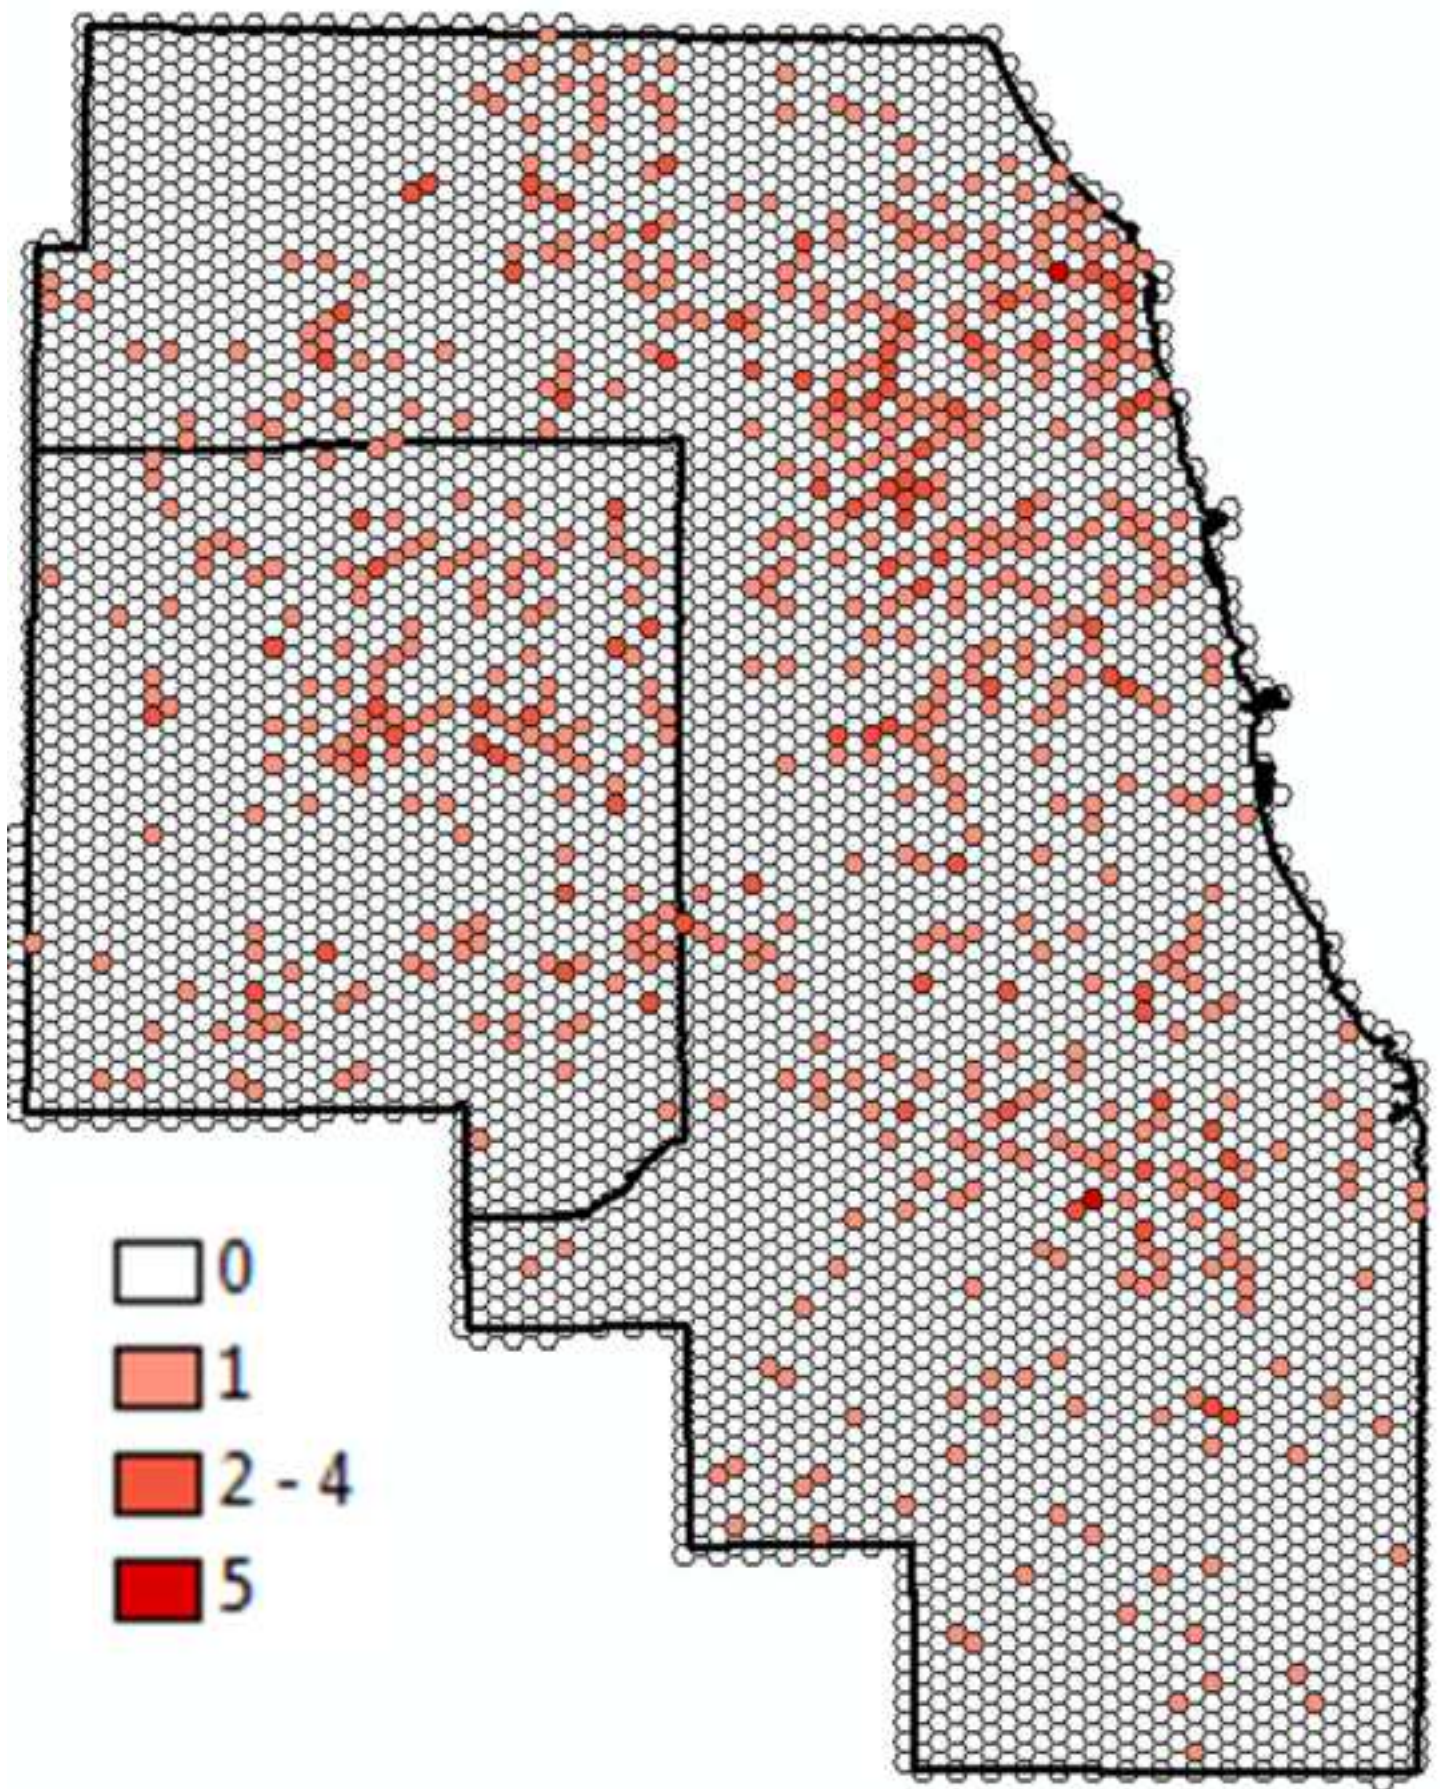



Figure 5

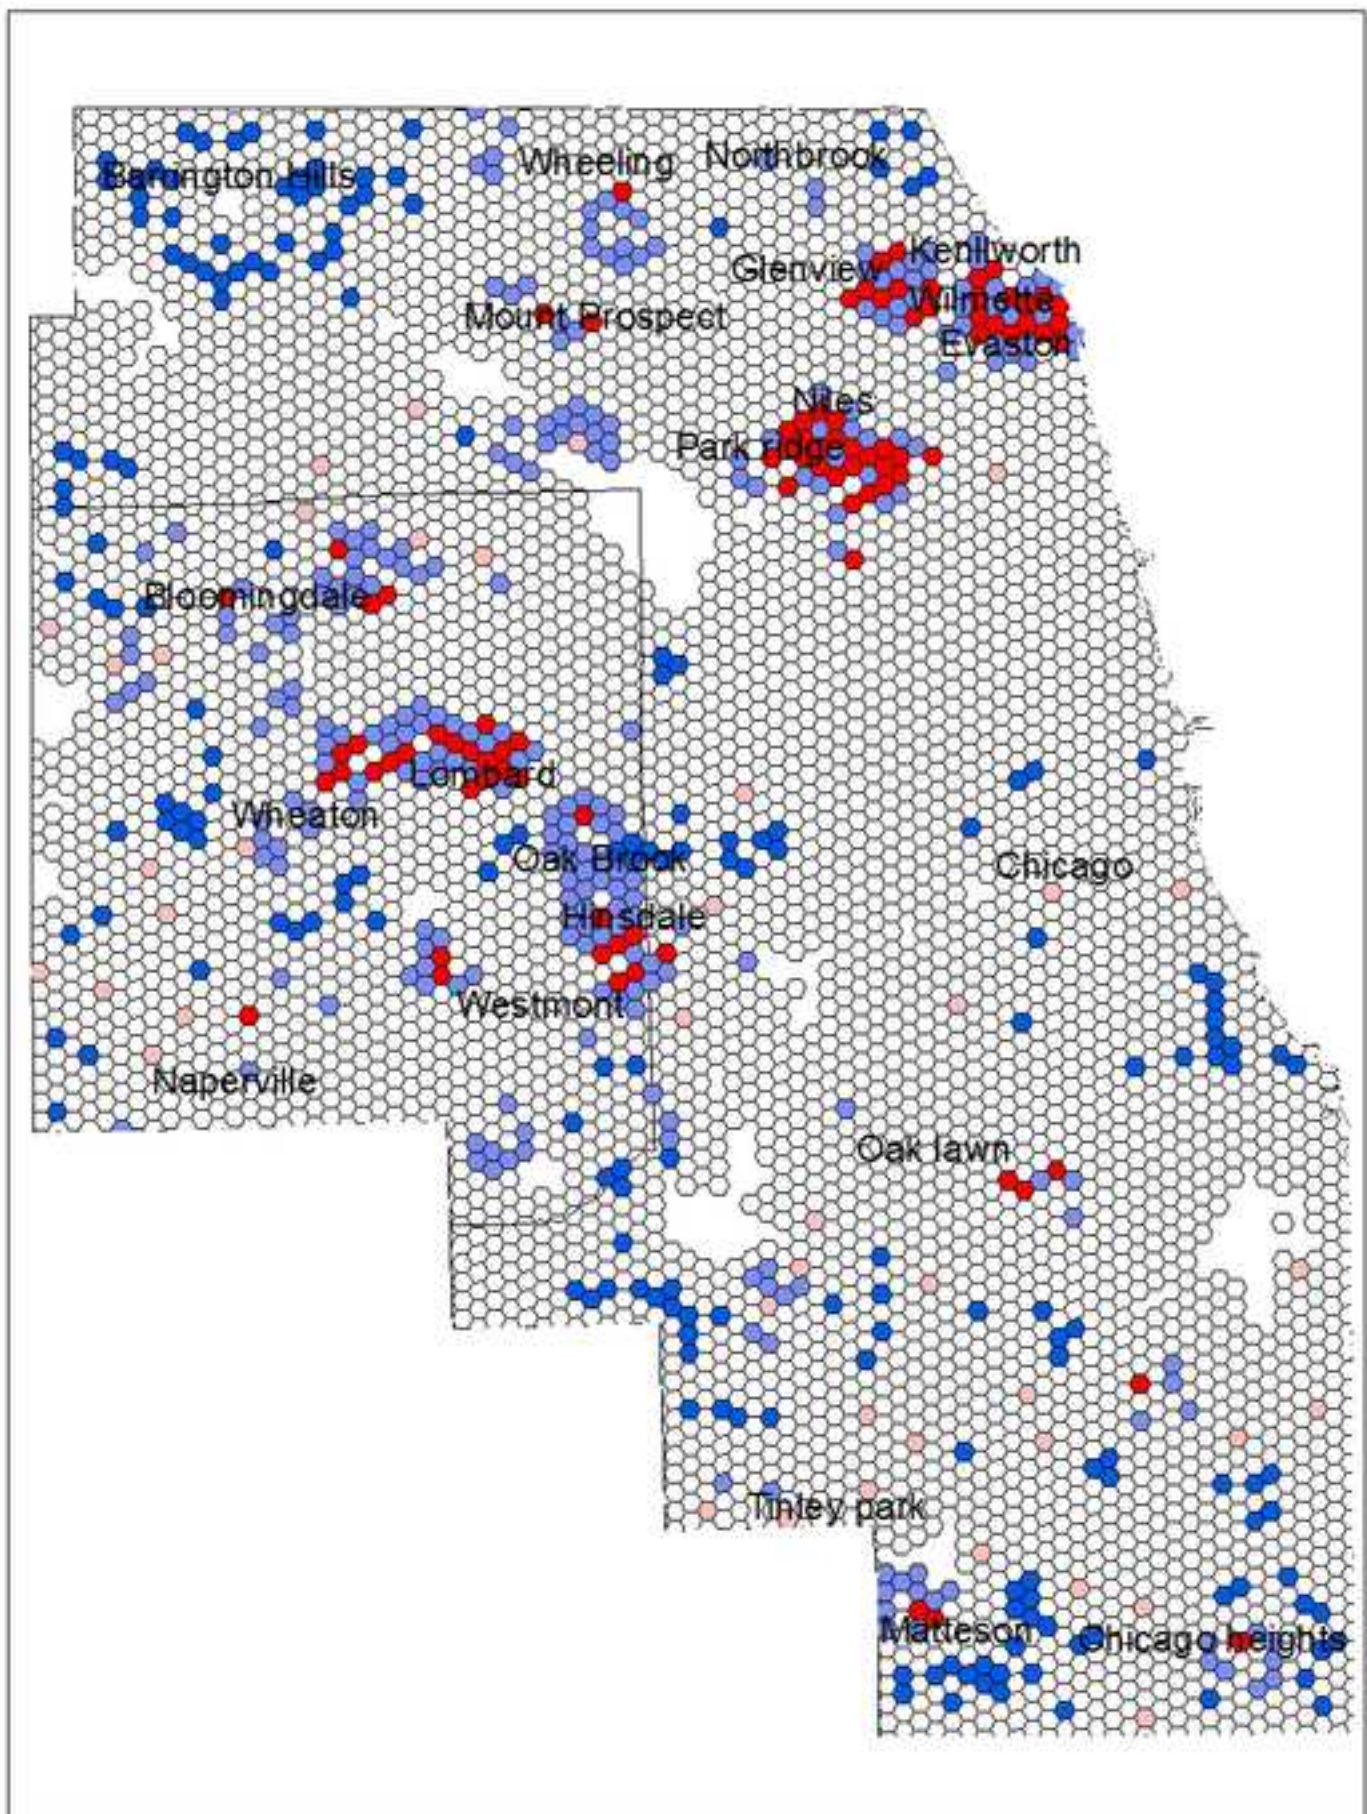

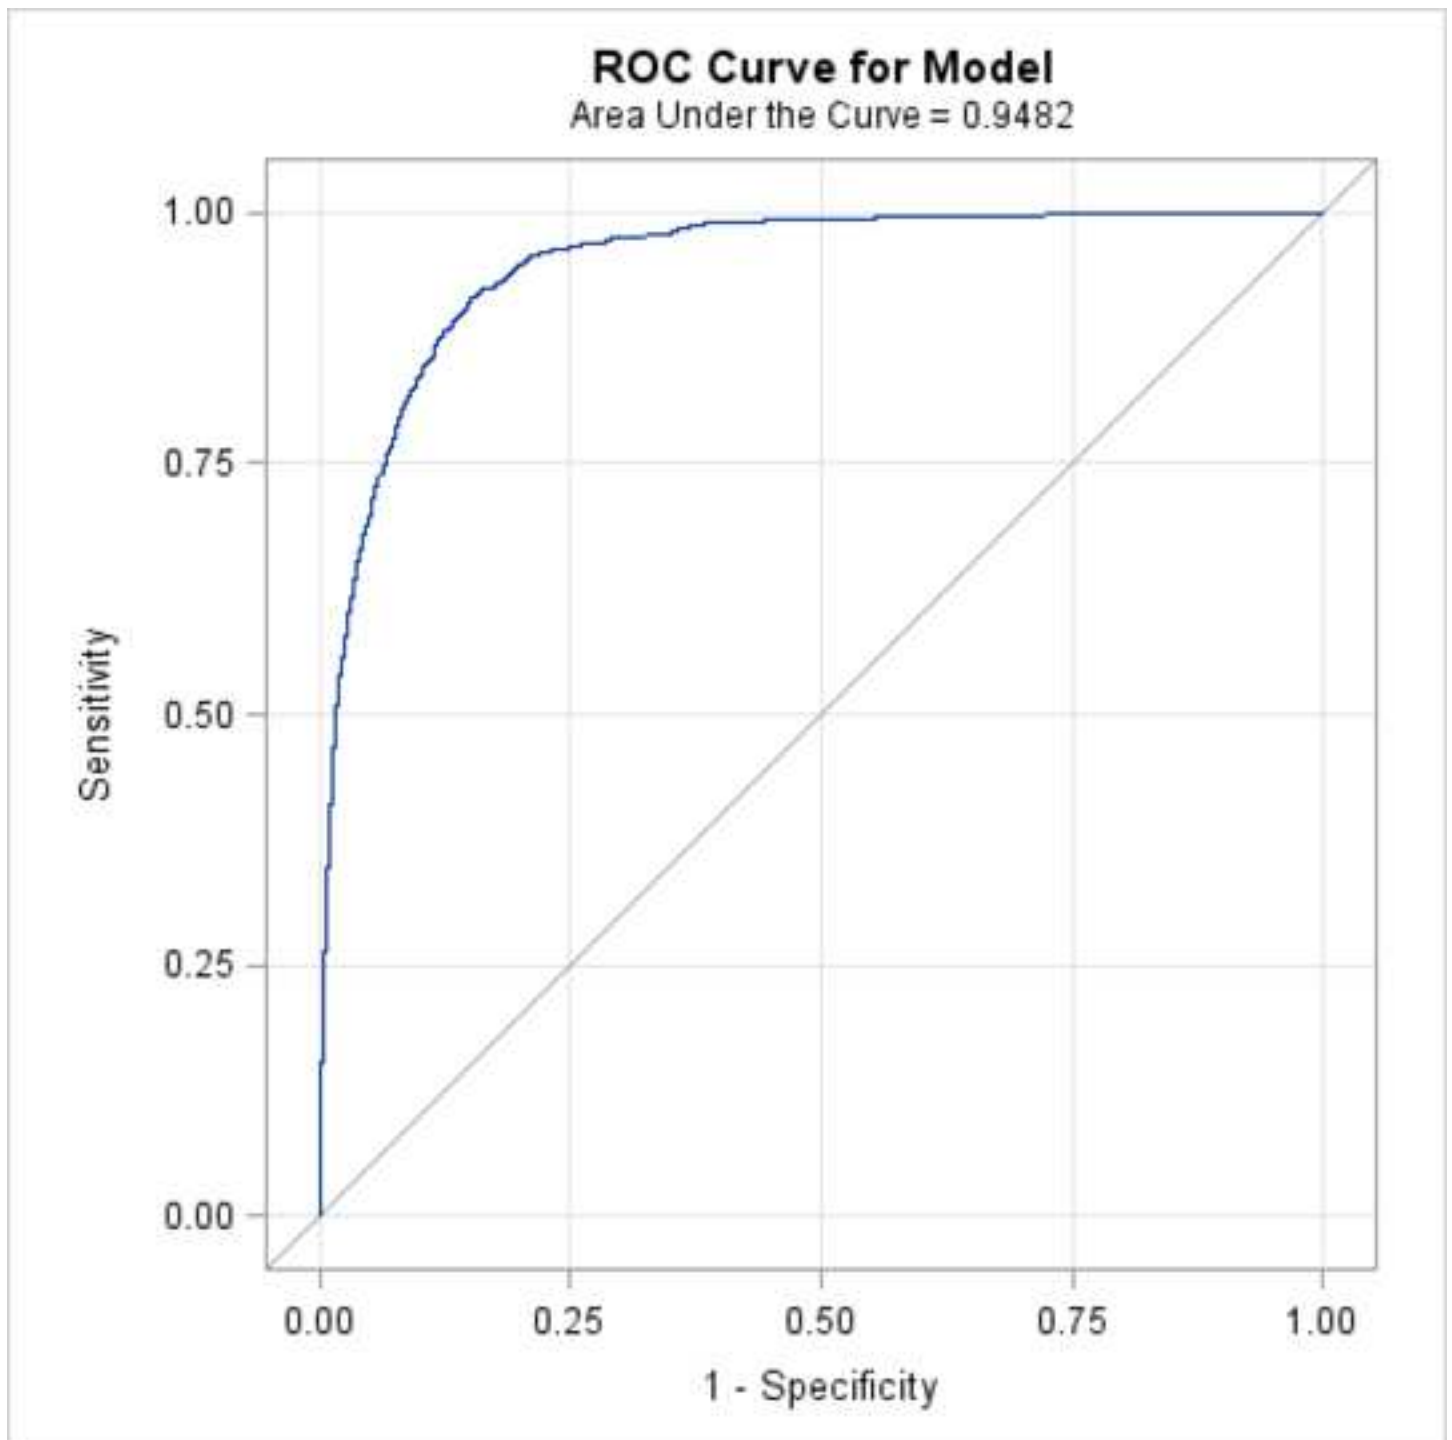

1     **The drivers of West Nile virus human illness in the Chicago, Illinois, USA area: fine**  
2     **scale dynamic effects of weather, mosquito infection, social, and biological conditions**

3  
4  
5     Surendra Karki<sup>1</sup>, William M. Brown<sup>1</sup>, John Uelmen<sup>1</sup>, Marilyn O. Ruiz<sup>1</sup>, Rebecca Lee Smith<sup>1,\*</sup>

6     <sup>1</sup>Department of Pathobiology, University of Illinois, Urbana-Champaign, Illinois, USA

7  
8     \*Corresponding author

9     Email: [rlsdvm@illinois.edu](mailto:rlsdvm@illinois.edu)

10  
11     Short title: Fine scale drivers of West Nile virus human illness

12

## 13 **Abstract**

14 West Nile virus (WNV) has consistently been reported to be associated with human cases of  
15 illness in the region near Chicago, Illinois. However, the number of reported cases of human  
16 illness varies across years, with intermittent outbreaks. Several dynamic factors, including  
17 temperature, rainfall, and infection status of vector mosquito populations, are responsible for  
18 much of these observed variations. However, local landscape structure and human  
19 demographic characteristics also play a key role. The geographic and temporal scales used to  
20 analyze such complex data affect the observed associations. Here, we used spatial and  
21 statistical modeling approaches to investigate the factors that drive the outcome of WNV  
22 human illness on fine temporal and spatial scales. Our approach included multi-level  
23 modeling of long-term weekly data from 2005 to 2016, with weekly measures of mosquito  
24 infection, human illness and weather combined with more stable landscape and demographic  
25 factors on the geographical scale of 1000m hexagons. We found that hot weather conditions,  
26 warm winters, and higher MIR in earlier weeks increased the probability of an area of having  
27 a WNV human case. Higher population and the proportion of urban light intensity in an area  
28 also increased the probability of observing a WNV human case. A higher proportion of open  
29 water sources, percentage of grass land, deciduous forests, and housing built post 1990  
30 decreased the probability of having a WNV case. Additionally, we found that cumulative  
31 positive mosquito pools up to 31 weeks can strongly predict the total annual human WNV  
32 cases in the Chicago region. This study helped us to improve our understanding of the fine-  
33 scale drivers of spatiotemporal variability of human WNV cases.

34

## 35 **Introduction**

36 West Nile virus (WNV), a mosquito-borne zoonotic disease, was first identified in the  
37 United States in the summer of 1999 in New York City [1]. The mosquitoes of several *Culex*

38 species are the primary enzootic and bridge vectors for the transmission of WNV, and several  
39 bird species are known to contribute in the amplification of the virus [2–4]. Since its first  
40 successful invasion in New York, WNV quickly adapted to the local populations of *Culex*  
41 vector mosquitoes and avian populations and rapidly spread throughout the conterminous  
42 United States [5,6]. The first major WNV outbreak in the United States was observed in  
43 2002, when more than 4,150 human cases and 284 deaths attributable to WNV infection were  
44 reported to the CDC from 40 states compared to only 149 cases and 19 deaths from 10 states  
45 cumulatively during the three years from 1999 to 2001 [7]. This stirred a prompt public  
46 health response from federal, state, and local public health agencies and led to the  
47 establishment of a more robust surveillance of mosquitoes and birds to monitor and control  
48 the spread of WNV [8].

49         Public health surveillance for West Nile virus (WNV) involves collection and testing  
50 of *Culex* vector mosquitoes, collection and testing of dead birds suspected to have died of  
51 WNV, testing of sentinel chickens or of wild birds captured for this purpose, and reporting of  
52 cases of human and equine illness [9]. The ultimate goal of these surveillance data is to target  
53 mosquito control, and thereby reduce illness through the reduction of the number of infected  
54 vector mosquitoes, and to target educational messages to warn citizens to reduce individual  
55 exposure. One additional advantage of having a strong surveillance system in place is that the  
56 long-term data generated can be integrated with publicly available weather, landscape, and  
57 socioeconomic data and can be used effectively to identify the important drivers of WNV  
58 transmission and to develop predictive models [10,11].

59         Several earlier studies have identified some of the important drivers of WNV  
60 transmission in humans. These factors include prior weather conditions and landscape  
61 structure that affect the mosquito's biological responses, the abundance and infection status  
62 of the vector mosquitoes, demographic and social characteristic of population, individual

63 human behavior, and the level of public awareness [10–17]. For example, an analysis of 12  
64 years of mosquito testing and human illness data in Ontario, Canada showed that, while the  
65 mosquito infection rate of one week earlier was the strongest temporal predictor of human  
66 risk of WNV, an epidemic threshold based on the cumulative positive *Culex* pools up to mid-  
67 August (week 34) can be successfully used to predict human WNV epidemics [16]. In Long  
68 Island, New York, more than 65% of forecast models based on past mosquito infection and  
69 human illness correctly predicted seasonal total human WNV cases up to 9 weeks before the  
70 first reported cases [18]. Similarly, the vector index, based on a combination of vector  
71 infection and abundance was found to be highly correlated with human WNV cases in studies  
72 conducted in Larimer County, Colorado (Fauver et al., 2015), and Dallas, Texas [19].

73         Weather factors are important drivers of WNV transmission due to their direct effect  
74 in mosquito biology. When compared with human WNV cases, higher than normal average  
75 annual temperatures are associated with an increased likelihood of higher WNV disease  
76 incidence, nationally and in most regions in the United States [17]. This relationship was true  
77 in Europe, too, where abnormally high July temperature was associated with higher incidence  
78 of human WNV cases [20]. The role of precipitation is often controversial and varies by  
79 study regions. For example, higher than normal precipitation was positively associated with  
80 higher human WNV cases in the eastern region of the United States, but this relationship was  
81 reversed for the western region [21]. Another study identified drought as an important driver  
82 of WNV epidemics in the United States [22]. Local landscape structures have also been  
83 associated with human WNV incidence. The important land cover variables associated with  
84 increased risks of human WNV include proximity to wetlands [23,24], higher tree density  
85 [24], irrigated and agricultural rural areas [25], urban areas characterized by higher  
86 impervious surfaces and storm sewer systems [26], and inner suburbs characterized by older  
87 houses, moderate vegetation and moderate population [27].

88           Apart from extrinsic factors, population structure, demographic characteristics, and  
89 individual variation also play roles in WNV epidemics [28]. As people age, especially when  
90 they have a history of hypertension and immunosuppression, their risk of WNV disease  
91 increases [29,30]. Community characteristics such as income level, the age of housing,  
92 management of sewer and drainage system, mosquito abatement practices, and public health  
93 infrastructure also determines the risk of WNV human infections [12,26].

94           Different spatial scales have been used in geographical analyses to identify the drivers  
95 of human risk from WNV infections. The most commonly used spatial scale in the United  
96 States is counties [17,22,31], census tracts or Zip Code Tabulation Areas (ZCTA) [12,32],  
97 census block groups [33], and buffers of varying sizes around trap locations or human cases  
98 [24]. Each of these spatial scales has its own inherent biases, as these political boundaries do  
99 not necessarily correspond to the ecological processes of the disease in question [34].  
100 Alternatively, dividing the area into equal spaces, such as rectangular bins or hexagons, has  
101 been used to reduce some of these biases (e.g. [35]). Hexagonal grids have an additional  
102 advantage in that they reduce the edge effects, better fit curved surfaces, and have identical  
103 neighbors [36,37].

104           In Illinois, WNV human infections have been endemic since 2002, with annual  
105 variability in the number of cases [38]. The majority of the human WNV cases have been  
106 reported from the northeastern region, where the largest number of people in the state is  
107 congregated. A census tract level analysis in this region using human WNV occurrence data  
108 from the 2002 outbreak year identified that census tracts with lower population density,  
109 relatively close WNV positive dead bird specimens, a higher percentage of older white  
110 residents, and housing built between 1950 and 1959 were more likely to be associated with  
111 spatial clusters of WNV cases [12]. A follow up expanded this study to look at annual  
112 incidence of WNV human illness in northeastern Illinois from 2002 to 2006, with additional

113 variables to assess the effects of rainfall, temperature and the WNV mosquito infection rate  
114 [39]. This analysis determined that white populations and housing from the 1950s were  
115 associated with increased illness in some years, but this was not consistent. Interestingly,  
116 census tracts with lower rainfall had higher rates of WNV illness, but the mosquito infection  
117 rate was not an important variable in any of the models [39].

118         Despite the identification of some of these potential risk factors, accurate prediction  
119 of human illness cases from WNV remains elusive at the local scale, especially as it is related  
120 to dynamic weather and mosquito infection status. Using long-term data on human WNV  
121 illness and intensive mosquito surveillance for the Chicago region, we can identify the fine  
122 scale drivers of spatiotemporal variability of human WNV epidemic in an urban environment.  
123 The overall goal of this study is to determine factors affecting the spatiotemporal variability  
124 of clinical WNV incidence in people through identification of the fine scale drivers of WNV  
125 transmission in an urban area with a repeated history of WNV outbreaks. These potential  
126 drivers include dynamic mosquito infection and weather. Our specific objectives in this study  
127 are to (i) describe the fine-scale temporal and spatial patterns of human WNV illness in the  
128 Chicago region, (ii) evaluate the temporal relationships between mosquito infection and  
129 human WNV illness, and (iii) determine the fine-scale dynamic effects of weather, land  
130 cover, mosquito infection, and demographic factors on the presence of human West Nile  
131 virus illness across time and space.

132

### 133 **Materials and methods**

134         This project was approved by the Institutional Review Boards of the University of  
135 Illinois Urbana-Champaign and the Illinois Department of Public Health.

136         The two Illinois counties of Cook and DuPage, comprising Chicago and its suburbs,  
137 were included in this study. The total area covered by these two counties is nearly 5,100



138 square kilometers, and the total population in 2010 was 6.1 million. These areas were  
139 selected because of the relatively high incidence of human West Nile virus illness reported  
140 from these two counties and the long-term intensive mosquito surveillance data available for  
141 this region. The temporal window included in this study was the 24-week time period from  
142 late May to late October (weeks 22 to 45), which corresponds to the timing of mosquito  
143 activity and human WNV illness, with data for the years from 2005 to 2016. The years from  
144 2002 to 2004, during which Illinois had its first invasion from WNV, were excluded in this  
145 analysis because of the absence of mosquito testing data. Data on avian and equid  
146 surveillance were not included as these programs were not consistently applied across the  
147 time period.

148 We chose to summarize all variables into hexagons to provide a neutral spatial unit of  
149 consistent size and shape, which is not possible with political boundaries. For this, we  
150 overlaid hexagons measuring 1000 m in diameter on the outlines of Cook and DuPage  
151 counties to create a grid of 5,345 hexagons for the study area. Out of these, 328 were  
152 excluded after a comparison with fine scale population data from the 2010 U.S. Census  
153 indicated that there were no households on record within those hexagons. Thus, 5,017  
154 hexagons were included in the analysis. All independent variables related to weather, land  
155 cover, mosquito infection and demography were calculated for each hexagon, as described  
156 below.

#### 157 *Mosquito data*

158 Mosquito testing data from 2005 to 2016 were obtained from the Illinois Department  
159 of Public Health (IDPH) through a user agreement. The IDPH collates the data from local  
160 public health agencies and mosquito abatement districts across Illinois and maintains a  
161 statewide database for the results from WNV mosquito testing. The IDPH developed a  
162 mosquito surveillance protocol that local health and mosquito abatement districts are

163 expected to follow in order to standardize the mosquito collection and testing across the state.  
164 In general, the local agencies collect vector mosquitoes with gravid traps, identify the sex and  
165 species of the mosquitoes, and make pools of up to 50 mosquitoes of a single species from  
166 those captured in each trap to test for the presence of WNV infection. When fewer than 50  
167 mosquitoes are captured, a pool will consist of fewer than 50 mosquitoes. During the study  
168 period, the common tests used to identify WNV in mosquitoes included antigen assays,  
169 VecTest or the Rapid Analyte Measurement Platform (RAMP) test. Some pools were also  
170 tested by Real Time reverse transcriptase polymerase chain reaction (RT-PCR). In instances  
171 when a pool was tested using more than one type of test, only the RT-PCR results were used  
172 in the analysis. Our analysis used only the test results from pools of female *Culex*  
173 mosquitoes. Not all mosquitoes were identified to species prior to testing; however, the  
174 majority of *Culex* collected in this region belong to the species *Cx. pipiens* or *Cx. restuans*  
175 [3].

176 To determine the location of the mosquito traps, we used the existing latitude and  
177 longitude recorded in the IDPH database. In cases where the spatial data were missing, we  
178 geocoded the trap locations based on the address provided. Our analysis used all the trap  
179 locations recorded from 2005 to 2016 from Cook and DuPage counties in addition to any  
180 traps located within a 10 km radius from their boundaries (located within Lake, McHenry,  
181 Kane, Kendall, and Will counties). For each trap, the mosquito infection rate (MIR) was  
182 calculated by week and by year using the formula

183 
$$1000 * \frac{\text{number of positive pools}}{\text{total number of mosquitos in pools tested}} \quad [40](\text{Biggerstaff, 2006}).$$

184 Using MIR calculations from all traps, we developed continuous surface maps for  
185 MIR for each week and year using the inverse distance weighting (IDW) interpolation  
186 technique in ArcGIS 10.1. From this interpolated surface map for each year and week, the

187 average, minimum, and maximum MIR for each hexagon was calculated using the zonal  
188 statistics as table function in ArcGIS 10.1. A model builder platform using iteration features  
189 in ArcGIS 10.1 was used to run these processes.

#### 190 *Human illness data*

191 Records of human WNV cases in Illinois were obtained from the IDPH through a user  
192 agreement. All confirmed and probable cases of WNV reported to the IDPH by medical and  
193 public health personnel for the study area were included in this study; the state of Illinois  
194 mandates reporting of WNV to local public health departments, which then report all cases to  
195 IDPH. Probable cases are those that meet clinical criteria during the season when  
196 transmission is likely to occur and meet laboratory criteria for West Nile virus by serology  
197 (IgM capture ELISA) or polymerase chain reaction, while confirmed cases are those with  
198 confirmatory test results from the IDPH or the Centers for Disease Control and Prevention.

199 All the human WNV cases in Cook and DuPage counties reported from 2005 to 2016 were  
200 geocoded and aggregated by hexagons for each week and year. The data were converted into  
201 the binary form of presence or absence of a WNV case in a given hexagon and week.

#### 202 *Demographic data*

203 The demographic variables included were total population, racial composition,  
204 housing age, and income level. The total population and racial composition included the  
205 number of White, African American, Asian, and Hispanic people at the census block level, as  
206 reported in the 2010 U.S. Census. The racial population data was converted to the percentage  
207 of White, African American, Asian, and Hispanic people in each hexagon. The income data  
208 for the block group level were obtained from the 2015 American Community Survey.  
209 Housing age was included as the proportions of housing built in different time periods, which  
210 was obtained at the block group level from the 2015 American Community Survey. We  
211 divided housing age into four different time-periods: pre-World War II houses (built before

212 1939), post-World War II houses (built between 1940 and 1969), houses built between 1970  
213 and 1989, and houses built after 1990. These demographic data were processed in ArcGIS  
214 using the intersection tool to calculate a parameter for each hexagon.

#### 215 *Landcover data*

216 Landcover data for the entire United States was obtained from the national landcover  
217 database (NLCD) for the years 2006 and 2011. The NLCD database is a Landsat based  
218 landcover data available at a 30 m resolution ([www.mrlc.gov](http://www.mrlc.gov)). The landcover raster was  
219 clipped for Cook and DuPage counties, including a surrounding 1 km buffer. From this  
220 clipped raster, the total number of pixels for each land category within each hexagon was  
221 calculated using the tabulate as area tool in ArcGIS 10.1. The proportion of each land cover  
222 category for each hexagon was then calculated by dividing the number of pixels for that  
223 category by the total number of pixels for all categories. In Cook and DuPage counties, 15  
224 different types of landcover were available: urban areas (developed open space, developed  
225 low intensity, developed medium intensity, developed high intensity), forests (deciduous,  
226 evergreen and mixed), barren land, shrubs, grassland, pasture, cultivated crops, woody  
227 wetlands, herbaceous wetlands, and open water. The land cover data from 2006 was used to  
228 analyze the WNV cases for the years from 2006 to 2010, while the land cover data from 2011  
229 was used for 2011 to 2016.

#### 230 *Weather data*

231 Spatial weather data on daily mean temperature and precipitation from 2005 to 2016  
232 were obtained from the PRISM Climate Group (PRISM Climate Group, Oregon State  
233 University, <http://prism.oregonstate.edu>). The PRISM daily data are available as spatial grids  
234 of 4 km resolution, which are calculated through interpolation and statistical techniques using  
235 point data from weather monitoring networks across the country combined with topographic  
236 data. These daily data were used to calculate the weekly temperature and precipitation. For

237 our analysis, the weekly mean temperature was calculated by taking the average of the seven  
238 daily averages for that week, and the weekly precipitation was calculated as a sum of the  
239 daily precipitation for that week. Finally, the weekly temperature and precipitation for each  
240 year and week for each hexagon was calculated by using the zonal statistics as table function  
241 in ArcGIS 10.1. We also calculated average January temperature for each hexagon for each  
242 year from the daily data as a proxy for the winter temperature.

#### 243 *Statistical methods*

244 To assess the temporal relationship between human illness and MIR, we calculated  
245 the Spearman rank correlation between the weekly MIR of 1-6 weeks lag and human cases.  
246 We repeated this analysis on the subsets of years with high numbers of WNV cases (more  
247 than 100 human cases; 2005, 2006, 2012 and 2016) and those with low numbers of WNV  
248 cases (less than 100 cases; 2007 - 2009, 2010, 2011, 2013 - 2015) to examine if the  
249 relationship between MIR and human cases varies in high and low years. We further  
250 examined the ability of the early summer (weeks 22- 27) and mid-summer (weeks 28- 33)  
251 average MIR to explain and predict the seasonal annual total WNV cases by using linear  
252 regression analysis. In addition, we assessed the ability of the cumulative positive mosquito  
253 pools up to week 28 and thereafter, added to each week's data, to find a threshold that could  
254 best explain the annual total human WNV cases. In both of these calculations, data from 2005  
255 to 2014 were used to create a regression equation, and data from 2015 and 2016 was used to  
256 test the model.

257 To visualize the spatial patterns of human illness over time, we first developed  
258 choropleth maps of WNV cases. Then, we used local Moran's I method using an inclusive  
259 second order queen contiguity weight matrix in the spatial analysis software GeoDa to further  
260 identify the spatial clusters of cumulative human WNV cases from 2005 to 2016. We also

261 examined differences in results using neighboring cells and rook contiguity weight matrix,  
262 but the results did not vary.

263 For the spatiotemporal statistical model, the outcome variable was the presence/  
264 absence of a human WNV case in each hexagon for each year and week. The predictors  
265 included 32 variables related to weather, land cover, mosquito infection and demography  
266 (Table 1). The weather variables consisted of mean weekly temperature and precipitation  
267 with lags of one to four weeks. The land cover variables include 15 categories, the proportion  
268 for each hexagon of: developed open space; developed low, medium, and high intensity  
269 urban areas; deciduous, evergreen, and mixed forests; barren land; shrubs; grassland; pasture;  
270 cultivated crops; woody wetlands; herbaceous wetlands; and open water. The mosquito  
271 infection data included the average MIR with lags of one to four weeks for each hexagon for  
272 each year and week. Demographic variables for each hexagon included the proportion of  
273 White, African American, Asian, and Hispanic population and the average median household  
274 income. In total, there were 1.44 million rows of data (5017 hexagons \* 12 years \* 24  
275 weeks). A correlation matrix among all variables was created to evaluate multicollinearity  
276 before running the model. As our response variable was binary (presence or absence of WNV  
277 human cases), we used mixed effects multiple logistic regression with stepwise selection for  
278 the statistical analysis, with hexagons as a random variable. We used the PROC GLIMMIX  
279 procedure in the SAS statistical software. An Akaike information criterion (AIC) was used to  
280 choose the best model [41]. A receiver operating characteristics (ROC) curve was calculated  
281 using model predictions for 2015 and 2016 to evaluate model performance. All the statistical  
282 analyses were conducted in SAS 9.4 (SAS Institute Inc., Cary).

283

284 Table 1. List of explanatory variables.

| <b>Variables</b>                            | <b>Notation</b> |
|---------------------------------------------|-----------------|
| <i>Land cover</i>                           |                 |
| Proportion of developed open space          | dospct          |
| Proportion of developed low intensity       | dlipct          |
| Proportion of developed medium intensity    | dmipct          |
| Proportion of developed high intensity      | dhipct          |
| Proportion of deciduous forests             | dfpct           |
| Proportion of evergreen forests             | efpct           |
| Proportion of mixed forests                 | mfpct           |
| Proportion of barren land                   | blpct           |
| Proportion of shrubs                        | shrubspct       |
| Proportion of grassland                     | glandpct        |
| Proportion of pasture                       | pasturepct      |
| Proportion of cultivated land               | clpct           |
| Proportion of woody wetlands                | wwpct           |
| Proportion of herbaceous wetlands           | hwpct           |
| Proportion of open water                    | owpct           |
| <i>Mosquito infection rate</i>              |                 |
| Mosquito infection of one week before       | mirlag1         |
| Mosquito infection of two weeks before      | mirlag2         |
| Mosquito infection of three weeks before    | mirlag3         |
| Mosquito infection of four weeks before     | mirlag4         |
| <i>Weather</i>                              |                 |
| <i>Temperature</i>                          |                 |
| Average temperature of one week before      | templag1        |
| Average temperature of two weeks before     | templag2        |
| Average temperature of three weeks before   | templag3        |
| Average temperature of four weeks before    | templag4        |
| <i>Precipitation</i>                        |                 |
| Average precipitation of one week before    | precilag1       |
| Average precipitation of two weeks before   | precilag2       |
| Average precipitation of three weeks before | precilag3       |
| Average precipitation of four weeks before  | precilag4       |
| <i>Demographic factors</i>                  |                 |
| Percentage of White population              | whitepct        |
| Percentage of African American              | blackpct        |
| Percentage of Asian population              | asianpct        |
| Percentage of Hispanic                      | hispanicpct     |
| Median household income                     | income          |

285

286 **Results**

287 There were 1,371 total human WNV cases reported in Illinois from 2005 to 2016. Out

288 of these total reported cases, 906 cases (66%) were from the Chicago region (Cook and

289 DuPage Counties). The number of human WNV cases in the study region varied annually,  
 290 with the year 2012 reporting the highest number of cases (229) and the lowest number of  
 291 cases (1) reported in 2009 (Table 2). The average annual MIR during the mosquito season  
 292 was also highest in 2012 (7.34), with 31.3% of tested pools positive for WNV (Table 2). The  
 293 number of mosquito pools tested annually ranged from about 6,000 pools in 2016 to over  
 294 12,000 pools in 2007.

295

296 Table 2. Annual human WNV cases, average seasonal mosquito infection rate (MIR), and  
 297 mosquito testing from 2005 to 2016 in Cook and DuPage counties.

| Year | Number of human cases | Average MIR | Number of pools tested | Number of positive pools | Total number of mosquitoes tested |
|------|-----------------------|-------------|------------------------|--------------------------|-----------------------------------|
| 2005 | 181                   | 5.33        | 7,165                  | 1,939                    | 271,235                           |
| 2006 | 129                   | 5.35        | 9,428                  | 1,984                    | 318,386                           |
| 2007 | 43                    | 2.65        | 12,131                 | 1,259                    | 375,520                           |
| 2008 | 10                    | 1.91        | 9,024                  | 587                      | 298,995                           |
| 2009 | 1                     | 1.14        | 9,450                  | 298                      | 311,220                           |
| 2010 | 47                    | 5.19        | 11,491                 | 2,086                    | 393,279                           |
| 2011 | 24                    | 3.10        | 8,911                  | 939                      | 287,774                           |
| 2012 | 229                   | 7.35        | 10,162                 | 3,182                    | 323,497                           |
| 2013 | 66                    | 4.26        | 11,078                 | 1,967                    | 407,326                           |
| 2014 | 31                    | 2.97        | 9,273                  | 990                      | 333,489                           |
| 2015 | 36                    | 3.57        | 7,725                  | 1,046                    | 314,363                           |
| 2016 | 108                   | 6.34        | 6,144                  | 1,687                    | 219,909                           |

298 MIR= Mosquito infection rate; WNV= West Nile virus

299

300 We found a strong temporal relationship between the MIR of previous weeks and  
 301 human WNV cases in the study region (Table 3, Fig 1). The strongest correlation ( $r= 0.837$ )  
 302 was with MIR at a one-week lag (Table 3). The strength of the correlation was stronger ( $r=$   
 303  $0.884$ ) in the subset of high infection years (2005, 2006, 2012, and 2016) and relatively lower  
 304 ( $r= 0.737$ ) in low years (Table 3). When evaluated for only 2012, when case counts were  
 305 highest, the correlation between MIR and human WNV cases was also the highest ( $r= 0.899$ ).



306 In both high and low years, the strength of the correlation gradually declined with the number  
 307 of weeks lagged and there was almost no correlation with MIR after lags of four weeks.

308

309

310 Table 3. Spearman correlation of weekly cumulative human WNV cases and lagged MIR  
 311 for all years and selected subsets of years from 2005- 2016 in Cook and DuPage Counties.

| MIR                | Years with Human WNV cases |       |       |                 |
|--------------------|----------------------------|-------|-------|-----------------|
|                    | All years                  | >100  | <100  | 229 (Year 2012) |
| Same week          | 0.776                      | 0.775 | 0.671 | 0.818           |
| One week before    | 0.837                      | 0.884 | 0.737 | 0.899           |
| Two weeks before   | 0.765                      | 0.766 | 0.698 | 0.875           |
| Three weeks before | 0.601                      | 0.574 | 0.556 | 0.727           |
| Four weeks before  | 0.429                      | 0.354 | 0.394 | 0.501           |
| Five weeks before  | 0.289                      | 0.147 | 0.286 | 0.283           |
| Six weeks before   | 0.142                      | 0.001 | 0.120 | 0.038           |

312 MIR= Mosquito infection rate; WNV= West Nile virus

313

314 Fig 1. Cumulative weekly human WNV cases (red bars) and mosquito infection rate (blue  
 315 line) from 2005- 2016 in Cook and DuPage Counties, Illinois.

316

317 We found that the MIR of mid-summer (weeks 28-33) was able to explain 93% of the  
 318 variability in total annual human cases (Table 4, Fig 2). The model predicted 44.8 human  
 319 cases for 2015, compared to 35 actual cases, and 142.7 human cases for 2016 compared to  
 320 108 actual cases. Likewise, the cumulative number of positive pools also strongly explained  
 321 and predicted the total annual human cases (Table 4, Fig 3); the cumulative number of  
 322 positive mosquito pools by week 31 explained 93% of the variability in total annual human  
 323 cases, similar to that explained by mid-summer MIR (Table 4). The model using cumulative  
 324 positive pools by week 31 predicted 35.1 human cases (vs. 35 actual cases) for 2015 and  
 325 102.8 human cases (vs. 108 actual cases) for 2016. The cumulative mosquito positive pools  
 326 by week 31 thus better predicted the annual human cases than the mid-summer MIR.

327

328 Table 4. The regression equations of the relationship between a cumulative number of WNV  
329 positive pools, mosquito infection rate in a six-week period early and mid-summer and  
330 human West Nile virus illnesses for the year for Cook and DuPage Counties from 2004-  
331 2014.

| Week                  | Regression equation                                 | R-square |
|-----------------------|-----------------------------------------------------|----------|
| 28                    | $30.1 + 0.445 * \text{Number of positive pools}$    | 0.721    |
| 29                    | $21.2 + 0.278 * \text{Number of positive pools}$    | 0.825    |
| 30                    | $11.8 + 0.194 * \text{Number of positive pools}$    | 0.895    |
| 31                    | $2.33 + 0.144 * \text{Number of positive pools}$    | 0.931    |
| 32                    | $- 6.0 + 0.118 * \text{Number of positive pools}$   | 0.917    |
| 33                    | $- 16.5 + 0.103 * \text{Number of positive pools}$  | 0.901    |
| 34                    | $- 23.7 + 0.0938 * \text{Number of positive pools}$ | 0.863    |
| 35                    | $- 29.5 + 0.0861 * \text{Number of positive pools}$ | 0.813    |
| Early summer (22- 27) | $13.7 + 162 * \text{average MIR of week 22- 27}$    | 0.833    |
| Mid-summer (28- 33)   | $- 16.7 + 14.7 * \text{average MIR of week 28- 33}$ | 0.936    |

332

333 Fig 2. The relationship between annual human WNV infections and mid-summer mosquito  
334 infection rate from 2005- 2014 in Cook and DuPage Counties, Illinois.

335

336 Fig 3. The relationship between annual human WNV infections and a cumulative number of  
337 WNV positive mosquito pools from 2005- 2014 in Cook and DuPage Counties, Illinois.

338

339 The spatial pattern of human WNV cases in Cook and DuPage counties showed that  
340 cases were distributed throughout most areas of the study region at some point during the  
341 study period, with some pockets of higher numbers of cases (Fig 4). Out of the total 5,345  
342 hexagons in the study area, 750 hexagons had experienced at least one case of human WNV  
343 case during the years 2005 to 2016. Cumulatively, 123 hexagons had more than one human  
344 WNV case, with the maximum number of cases in a hexagon being five (Fig 4). The local  
345 Moran's I identified some spatial clusters of human WNV cases in Cook and DuPage

346 counties (Fig 5): 92 hexagons with higher numbers of cases were also near to others with  
347 higher numbers of cases.

348

349 Fig 4. The spatial distribution of the cumulative number of human WNV infections from  
350 2005- 2016 in Cook and DuPage Counties, Illinois.

351

352 Fig 5. The local Moran's I result showing the spatial clustering of cumulative human WNV  
353 infections from 2005- 2016 in Cook and DuPage Counties, Illinois.

354

355         The results of the mixed-effects regression analysis showed that temperature,  
356 precipitation, land cover, mosquito infection, and demographic characteristics are all  
357 associated with the probability of an area having a case of WNV human illness. The AIC  
358 criteria used to compare the 10 best competing models showed that a model consisting of 15  
359 variables that included temperature, MIR, land cover, and demographic characteristics was  
360 the best model (Table 5). The final multivariable model indicated that higher temperatures  
361 two, three, and four weeks earlier and warmer average January temperature were associated  
362 with a higher probability of a hexagon being positive for human WNV case (Table 6). The  
363 lagged mosquito infection rates of one to four weeks earlier were also positively associated  
364 with the outcome variable (Table 6). Among the land cover variables, the proportion of open  
365 water, grassland, and deciduous forests were negatively associated with the probability of a  
366 WNV case while the proportion of low intensity developed areas was positively associated  
367 (Table 6). Among the demographic variable, total population was found to be positively  
368 associated with the probability of a WNV case, while the proportion of housing built after  
369 1990 was negatively associated (Table 6). The area under the ROC curve was 0.948, which  
370 indicates that model performance was excellent (Fig 6).

371

372 Table 5. Candidate models for predicting the probability of human WNV occurrence using  
 373 weather, land cover, mosquito infection, and demographic factors in Chicago region.

| Model | Variables included                                                                                                    | K  | -2 log likelihoods | AIC     | ΔAIC   |
|-------|-----------------------------------------------------------------------------------------------------------------------|----|--------------------|---------|--------|
| 1     | Yr + templag2- 4 + precilag2 + mirlag1- 4 + whitepct + owpct + dmipct + dhipct                                        | 14 | 12480.5            | 12530.5 | 0      |
| 2     | Yr + templag2- 4 + precilag2 and 4 + mirlag1- 4 + whitepct + owpct + dmipct + dhipct                                  | 15 | 12484.1            | 12536.1 | 5.6    |
| 3     | Yr + templag2- 4 + mirlag1- 4 + whitepct + owpct + dmipct + dhipct                                                    | 13 | 12489.3            | 12537.3 | 6.8    |
| 4     | Yr + templag2- 4 + precilag2 + mirlag1- 4 + whitepct + dmipct + dhipct                                                | 13 | 12490.8            | 12538.8 | 8.3    |
| 5     | Yr + templag2- 4 + precilag2 and 4 + mirlag1- 4 + whitepct + income + owpct + dmipct + dhipct                         | 16 | 12488.7            | 12542.7 | 12.2   |
| 6     | Yr + templag1- 4 + precilag2 and 4 + mirlag1- 4 + income + whitepct + owpct + dmipct + dhipct                         | 17 | 12503.5            | 12559.5 | 29     |
| 7     | Yr + templag1- 4 + precilag1-2 and 4 + mirlag1- 4 + income + whitepct + owpct + dmipct + dhipct                       | 18 | 12502.6            | 12560.6 | 30.1   |
| 8     | Yr + templag1- 4 + precilag1- 4 + mirlag1- 4 + income + whitepct + owpct + dmipct + dhipct + mfpct + glandpct + wwpct | 22 | 12502.6            | 12560.6 | 30.1   |
| 9     | Global model (all predictor variable included)                                                                        | 33 | 12476.47           | 12566.5 | 36     |
| 10    | Null model                                                                                                            | 1  | 14210.7            | 14214.7 | 1684.2 |

374

375

376 Table 6. Model parameters for the best model using weather, land cover, mosquito infection,  
 377 and demographic factors to predict the occurrence of WNV human cases in Chicago region.

| Variable                                      | Parameter estimate | F-value        | P-Value | Odds ratio (95% CI)     |
|-----------------------------------------------|--------------------|----------------|---------|-------------------------|
| Fixed effects                                 |                    |                |         |                         |
| Year                                          | -                  | 17.33          | <0.001  | -                       |
| Temperature of two weeks before               | 0.06963            | 22.36          | <0.001  | 1.08<br>(1.049 -1.112)  |
| Temperature of three weeks before             | 0.1085             | 42.99          | <0.001  | 1.128<br>(1.092- 1.165) |
| Temperature of four weeks before              | 0.1628             | 116.47         | <0.001  | 1.197<br>(1.162- 1.234) |
| Average January temperature                   | 0.3613             | 16.65          | <0.001  |                         |
| Mosquito infection rate of one week before    | 0.003199           | 21.53          | <0.001  | 1.003<br>(1.002- 1.004) |
| Mosquito infection rate of two weeks before   | 0.003938           | 38.79          | <0.001  | 1.004<br>(1.002- 1.005) |
| Mosquito infection rate of three weeks before | 0.004003           | 37.83          | <0.001  | 1.004<br>(1.002- 1.005) |
| Mosquito infection rate of four weeks before  | 0.003958           | 34.63          | <0.001  | 1.004<br>(1.002- 1.005) |
| Total population                              | 0.000225           | Infinity       | <0.001  | 1.009<br>(1.006- 1.012) |
| Open water percentage                         | -0.05527           | 9.58           | 0.002   | 0.954<br>(0.921- 0.988) |
| Developed light intensity percentage          | 0.01848            | 80.65          | <0.001  | 0.990<br>(0.985- 0.994) |
| Deciduous forest percentage                   | -0.02401           | 4.66           | 0.0309  | 0.985<br>(0.980- 0.991) |
| Grassland percentage                          | -0.04603           | 3.14           | 0.0763  |                         |
| Post 1990 built housing percentage            | -0.00546           | 4.28           | 0.0386  |                         |
| Random effect                                 |                    |                |         |                         |
| Subject                                       | Estimate           | Standard error | Z-value | P-value                 |
| Hexagon ID                                    | 1.1769             | 0.1636         | 7.19    | <0.0001                 |

378

379

380 Fig 6. The receiver operating characteristics (ROC) curve for the final model.

381

382 **Discussion**

383           We identified important fine-scale drivers of spatiotemporal variability in the human  
384 WNV cases in Chicago region, Illinois, an area of ongoing WNV transmission. Our analysis  
385 used long-term data on human illness, mosquito surveillance, weather, landscape, and  
386 demographic data. We found significant spatial clusters of human WNV cases within this  
387 urban environment. We also found a strong correlation between the weekly MIR of earlier  
388 weeks and weekly human WNV cases, and further developed predictive temporal models  
389 using mid-summer average MIR and cumulative positive mosquito pools which can be used  
390 to estimate the total annual human WNV cases.

391           The temporal variation in the weekly human WNV cases was strongly correlated with  
392 MIR of one to four weeks earlier, with a correlation of one week earlier being the strongest.  
393 This finding was similar to our earlier model based on Illinois climate divisions, in which  
394 Division 2 includes our current study area [42]. The similarity in the correlation may be due  
395 to the fact that the data for Climate Division 2 were dominated by the data from Cook and  
396 DuPage, as these counties have more intensive surveillance compared to other Illinois  
397 counties. However, similar observations were also found in Ontario, Canada, where MIR of  
398 one week earlier was most strongly correlated with the weekly variation in human WNV  
399 cases [16]. In our study, we also found that the correlations between weekly MIR and human  
400 cases increased in high WNV years, which was also observed in a study conducted in Long  
401 Island, New York [18]. This is understandable, as stochastic variability decreases with  
402 increased numbers of cases, allowing for more precise estimation.

403           The temporal models we developed using mid-summer average MIR and cumulative  
404 mosquito positive pools were both able to explain more than 90% of the variability in the  
405 annual number of human cases. This similarity of the results was not surprising, as positive  
406 mosquito pools are used to calculate the MIR. However, the cumulative positive pools up to  
407 week 31 better predicted the annual human cases compared to mid-summer average MIR for

408 2015 and 2016. The difference observed between the two approaches may reflect the  
409 variability of the MIR calculation depending on the mosquito pool size [43,44]. Taking the  
410 most extreme possibility, when there was only one mosquito in a pool and it tested positive,  
411 this would yield a MIR of 1000 in contrast to MIR of 20 when a pool with 50 mosquitoes was  
412 tested positive. In Ontario, Canada, the cumulative number of positive mosquito pools up to  
413 week 34 was suggested as an action threshold potential to estimate the total annual human  
414 cases [16]. In Chicago, we obtained this signal three weeks earlier, which can be crucial to  
415 the ability to intervene in the upcoming potential human WNV outbreak.

416         We found spatial clustering of human WNV cases within the study area, indicating  
417 that some areas were more likely than others to have a WNV human case. A spatial clustering  
418 pattern of human WNV cases in Chicago area was also observed in the 2002 WNV outbreak  
419 year [12]. Several factors might play a role in the observed spatial clustering pattern,  
420 including differences in the fine-scale variation in the local landscape structure that affects  
421 mosquito population, fine-scale weather variation, demographic characteristics, access of  
422 people to health care system, and spatially variable mosquito abatement practices  
423 [12,39,45,46].

424         In this study, through multilevel modeling, we identified several dynamic factors that  
425 are possibly driving the fine scale spatiotemporal variation in the human WNV cases  
426 occurrence in the Chicago region. We found that the higher temperature in the previous  
427 weeks increases the probability of an area being positive for a WNV case. The association  
428 between higher temperature and WNV human illness has also been observed in other studies  
429 conducted at different spatial scales [15,17,20]. This is possibly due to the dynamic effect of  
430 higher temperature on mosquito breeding and virus replication [35,47–49]. The unique  
431 feature of our study is that by considering the dynamic nature of weather, we allowed the  
432 temperature and precipitation to vary both temporally and spatially to capture the better role

433 of weather in the spatiotemporal variability of human WNV cases. The precipitation of earlier  
434 weeks was not as important as the temperature of the preceding weeks but still was  
435 moderately important. The negative association of precipitation observed indicated that dry  
436 and hot weather conditions would increase the probability of an area being positive for a  
437 WNV case. Some other studies have also indicated that hot dry weather conditions are  
438 conducive for WNV transmission [50,51]. While it may seem counter-intuitive that the  
439 proportion of open water was negatively correlated with WNV cases, given *Culex*  
440 populations would increase with an increase in breeding sites, the definition of open water  
441 (areas in which any aquatic vegetation is submerged) is such that it is unlikely to provide  
442 good breeding habitat for *Culex*.

443 We also found increased MIR up to four weeks earlier will increase the probability of  
444 an area being positive for a WNV human case. The temporal association between lagged  
445 MIR and human WNV cases is relatively well established [10,16,52]. However, it was  
446 interesting to find the positive association of MIR when spatiotemporal variabilities of human  
447 cases were considered. In our current analysis, we found that areas with a higher percentage  
448 of white population had a higher probability of being positive for WNV, which has also been  
449 observed in a previous study of this [12]. This may be a function of access to the health care  
450 system and likelihood of seeking medical treatment and testing [12,27], or may simply be due  
451 to high proportions of white population in areas of the study region where environmental  
452 conditions are also conducive to increased mosquito activity.

453 This study also found that the probability of a hexagon being a positive for WNV case  
454 decreased in developed medium and high-intensity urban areas and increased in developed  
455 low-intensity urban areas, indicating that the suburban areas of Chicago are more at risk than  
456 the highly developed urban centers. The lack of mosquito breeding grounds and bird activity  
457 in the high-intensity urban areas might be responsible for this. Previous studies conducted in



458 the same area have also indicated that sub-urban region in Chicago is at more risk from the  
459 WNV [12,27]. This is probably due to the poor sanitation system in the older houses  
460 compared to new houses.

461 In this study, we did not consider prior seasonal differences in the weather conditions,  
462 which we recommend be incorporated in future studies. In addition, the calculation of MIR  
463 for hexagons may be biased as the IDW interpolation technique used to develop continuous  
464 surface maps is affected by the uneven distribution of mosquito traps across the study area.  
465 Alternatively, other interpolation methods such as kriging might be used to develop  
466 continuous surface maps for MIR, as this method takes into account spatial autocorrelation  
467 and also creates an error map. In this study, we did not distinguish between neuroinvasive  
468 and non-neuroinvasive WNV cases. Separate analysis for only neuroinvasive cases might  
469 help us to identify what conditions drive the occurrence of the severe form of WNV infection  
470 and should also help to reduce diagnostic bias. Also, in future studies, we might consider  
471 using different spatial scales to identify if the geographic scale has affected the results. We  
472 were also unable to use data from avian or equid surveillance in this study, despite its  
473 usefulness in other modeling approaches [53–55], due to the lack of consistent data across the  
474 time period. Bird surveillance in Illinois is limited to passive surveillance of a small number  
475 of dead birds tested in each county per year, and is generally suspended after WNV is known  
476 to be circulating in the area, while equid surveillance is based entirely on passive self-  
477 reporting [56]. This lack of consistent data on avian mortality has been noticed by others  
478 [10], and remains an issue for the use of data on the primary host in WNV forecasting.

479 In conclusion, our analysis helped to better understand the fine-scale dynamic drivers  
480 of WNV transmission in an urban environment. The dynamic interplay between temperature  
481 and precipitation, mosquito infection, land cover, and demographic characteristics determine  
482 the probability of an area having a WNV case or not. Additionally, we established an

483 important temporal relationship between cumulative mosquito positive pools and mid-  
484 summer average MIR with the total annual human WNV cases. This information can be used  
485 as a guideline to develop a threshold for public health intervention.

486

## 487 **ACKNOWLEDGEMENTS**

488 This publication was supported by Cooperative Agreement #U01 CK000505, funded by the  
489 Centers for Disease Control and Prevention. Its contents are solely the responsibility of the  
490 authors and do not necessarily represent the official views of the Centers of Disease Control  
491 and Prevention or the Department of Health and Human Services.

492

## 493 **REFERENCES**

- 494 1. Lanciotti R, Roehrig J, Deubel V, Smith J, Parker M, Steele K, et al. Origin of the  
495 West Nile virus responsible for an outbreak of encephalitis in the northeastern United  
496 States. *Science* (80- ). 1999;286: 2333–2337.
- 497 2. Kilpatrick AM, LaDeau SL, Marra PP. Ecology of West Nile virus transmission and its  
498 impact on birds in the western hemisphere. *Auk*. 2007;124: 1121–1136.
- 499 3. Hamer GL, Kitron UD, Brawn JD, Loss SR, Ruiz MO, Goldberg TL, et al. *Culex*  
500 *pipiens* (Diptera: Culicidae): a bridge vector of West Nile virus to humans. *J Med*  
501 *Entomol*. 2008;45: 125–128.
- 502 4. Hamer GL, Walker ED, Brawn JD, Loss SR, Ruiz MO, Goldberg TL, et al. Rapid  
503 amplification of West Nile virus: the role of hatch-year birds. *Vector borne zoonotic*  
504 *Dis*. 2008;8: 57–68.
- 505 5. Hayes EB, Gubler DJ. West Nile virus: Epidemiology and clinical features of an  
506 emerging epidemic in the United States. *Annu Rev Med*. 2006;57: 181–194.
- 507 6. Brault AC. Changing patterns of West Nile virus transmission: altered vector  
508 competence and host susceptibility. *Vet Res*. 2009;40: 1–19.
- 509 7. Centers for Disease Control and Prevention (CDC). West Nile virus [Internet]. 2017  
510 [cited 15 Oct 2016]. Available: <https://www.cdc.gov/westnile/statsmaps/final.html>
- 511 8. Marfin AA, Petersen LR, Eidson M, Miller J, Hadler J, Farello C, et al. Widespread  
512 West Nile virus activity, eastern United States, 2000. *Emerg Infect Dis*. 2000;7: 730.
- 513 9. Lindsey NP, Staples JE, Lehman JA, Fischer M. Surveillance for human west nile  
514 virus disease - United states, 1999-2008. *MMWR Surveill Summ*. 2010;59: 1–17.
- 515 10. Kilpatrick AM, Pape WJ. Predicting human West Nile virus infections with mosquito  
516 surveillance data. *Am J Epidemiol*. 2013;178: 829–835.
- 517 11. Manore CA, Davis J, Christofferson RC, Wesson D, Hyman JM, Mores CN. Towards  
518 an early warning system for forecasting human West Nile virus incidence. *PLoS Curr*.  
519 2014;6.
- 520 12. Ruiz MO, Tedesco C, McTighe TJ, Austin C, Kitron U. Environmental and social  
521 determinants of human risk during a West Nile virus outbreak in the greater Chicago  
522 area, 2002. *Int J Health Geogr*. 2004;3: 8–18.

- 523 13. Roiz D, Ruiz S, Soriguer R, Figuerola J. Climatic effects on mosquito abundance in  
524 Mediterranean wetlands. *Parasit Vectors*. 2014;7: 333.
- 525 14. Rosa R, Marini G, Bolzoni L, Neteler M, Metz M, Delucchi L, et al. Early warning of  
526 West Nile virus mosquito vector: climate and land use models successfully explain  
527 phenology and abundance of *Culex pipiens* mosquitoes in north-western Italy.  
528 *Parasites Vectors* 7 1. 2014;1: 269–280.
- 529 15. Wimberly MC, Lamsal A, Giacomo P, Chuang T-W. Regional Variation of Climatic  
530 Influences on West Nile Virus Outbreaks in the United States. *Am J Trop Med Hyg*.  
531 2014;91: 677–684.
- 532 16. Giordano B V, Kaur S, Hunter FF. West Nile virus in Ontario Canada: A twelve-year  
533 analysis of human case prevalence, mosquito surveillance, and climate data. *PLoS*  
534 *One*. 2017;12.
- 535 17. Hahn MB, Monaghan AJ, Hayden MH, Eisen RJ, Delorey MJ, Lindsey NP, et al.  
536 Meteorological conditions associated with increased incidence of West Nile virus  
537 disease in the United States, 2004-2012. *Am J Trop Med Hyg*. 2015;92: 1013–1022.
- 538 18. Defelice NB, Little E, Campbell SR, Shaman J. Ensemble forecast of human West  
539 Nile virus cases and mosquito infection rates. *Nat Commun*. 2017;8: 1–6.  
540 doi:10.1038/ncomms14592
- 541 19. Chung WM, Buseman CM, Joyner SN, Hughes SM, Fomby TB, Luby JP, et al. The  
542 2012 West Nile Encephalitis Epidemic in Dallas, Texas. *JAMA*. 2013;8874: 297–307.  
543 doi:10.1001/jama.2013.8267
- 544 20. Tran A, Sudre B, Paz S, Rossi M, Desbrosse A, Chevalier V, et al. Environmental  
545 predictors of West Nile fever risk in Europe. *Int J Health Geogr*. 2014;13: 26–36.
- 546 21. Landesman WJ, Allan BF, Langerhans RB, Knight TM, Chase JM. Inter-annual  
547 associations between precipitation and human incidence of West Nile virus in the  
548 United States. *Vector borne zoonotic Dis*. 2007;7: 337–343.
- 549 22. Paull SH, Kilpatrick AM, Horton DE, Diffenbaugh NS, Ashfaq M, Rastogi D, et al.  
550 Drought and immunity determine the intensity of west nile virus epidemics and climate  
551 change impacts. *Proc R Soc B Biol Sci*. 2017;284. doi:10.1098/rspb.2016.2078
- 552 23. Chuang T-W, Hockett CW, Kightlinger L, Wimberly MC. Landscape-level spatial  
553 patterns of West Nile virus risk in the Northern Great Plains. *Am J Trop Med Hyg*.  
554 2012; 724–731.
- 555 24. Sallam MF, Michaels SR, Riegel C, Pereira RM, Zipperer W, Lockaby BG, et al.  
556 Spatio-Temporal Distribution of Vector-Host Contact (VHC) Ratios and Ecological  
557 Niche Modeling of the West Nile Virus Mosquito Vector *Culex quinquefasciatus*, in  
558 the City of New Orleans, LA, USA. *Int J Environ Res Public Health*. 2017;14: 892–  
559 911.
- 560 25. DeGroot JP, Sugumaran R. National and regional associations between human West  
561 Nile virus incidence and demographic landscape, and land use conditions in the  
562 coterminous United States. *Vector borne zoonotic Dis*. 2012;12: 657–665.
- 563 26. Liu H, Weng Q, Gaines D. Geographic incidence of human West Nile virus in  
564 northern Virginia USA, in relation to incidence in birds and variations in urban  
565 environment. *Sci Total Environ*. 2011;409: 4235–4241.
- 566 27. Ruiz M, Walker E, Foster E, Haramis L, Kitron U. Association of West Nile virus  
567 illness and urban landscapes in Chicago and Detroit. *Int J Health Geogr*. 2007;6: 10–  
568 20.
- 569 28. Brinton MA. Host factors involved in West Nile virus replication. *Ann N Y Acad Sci*.  
570 2001;951: 207–219.
- 571 29. Nolan MS, Schuermann J, Murray KO. West Nile virus infection among humans in

572 Texas, USA, 2002-2011. *Emerg Infect Dis*. 2013;19.1: 137.

573 30. Montgomery RR, Murray KO. Risk factors for West Nile virus infection and disease in  
574 populations and individuals. *Expert Rev Anti Infect Ther*. 2015;13: 317–325.

575 31. Davis JK, Vincent G, Hildreth MB, Kightlinger L, Carlson C, Wimberly MC.  
576 Integrating Environmental Monitoring and Mosquito Surveillance to Predict Vector-  
577 borne Disease: Prospective Forecasts of a West Nile Virus Outbreak. *PLoS Curr*. 2017;  
578 1–23. doi:10.1371/currents.outbreaks.90e80717c4e67e1a830f17feeaf85de

579 32. Wimberly MC, Giacomo P, Kightlinger L, Hildreth MB. Spatio-temporal  
580 epidemiology of human West Nile virus disease in South Dakota. *Int J Environ Res*  
581 *Public Health*. 2013;10: 5584–5602.

582 33. DeGroot JP, Sugumaran R, Brend S, Tucker B, Bartholomay L. Landscape  
583 demographic, entomological, and climatic associations with human disease incidence  
584 of West Nile virus in the state of Iowa, USA. *Int J Health Geogr*. 2008;7: 19.

585 34. Kwan M-P. The uncertain geographic context problem. *Ann Assoc Am Geogr*.  
586 2012;102: 958–968.

587 35. Ruiz MO, Chaves LF, Hamer GL, Sun T, Brown WM, Walker ED, et al. Local impact  
588 of temperature and precipitation on West Nile virus infection in *Culex* species  
589 mosquitoes in northeast Illinois, USA. *Parasit Vectors*. 2010;3: 19–34.

590 36. Birch CP, Oom SP, Beecham JA. Rectangular and hexagonal grids used for  
591 observation, experiment and simulation in ecology. *Ecol Modell*. 2007;206: 347–359.

592 37. Potter KM, Koch FH, Oswalt CM, Iannone B V. Data data everywhere: detecting  
593 spatial patterns in fine-scale ecological information collected across a continent.  
594 *Landsc Ecol*. 2016;31: 67–84.

595 38. IDPH. West Nile Virus [Internet]. 2016 [cited 15 Jan 2017]. Available:  
596 <http://www.dph.illinois.gov/topics-services/diseases-and-conditions/west-nile-virus>

597 39. Messina JP, Brown W, Amore G, Kitron UD, Ruiz MO. West Nile virus in the Greater  
598 Chicago area: A geographic examination of human illness and risk from 2002 to 2006.  
599 *URISA J*. 2011;23: 5–22.

600 40. Biggerstaff BJ. PooledInfRate. Division of Vector-Borne and Infectious Diseases,  
601 CDC; 2004.

602 41. Akaike H. Stochastic Theory of Minimal Realization. *IEEE Trans Automat Contr*.  
603 1974;19: 667–674. doi:10.1109/TAC.1974.1100707

604 42. Karki S, Westcott N, Muturi E, Brown W, Ruiz M. Assessing human risk of illness  
605 with West Nile virus mosquito surveillance data to improve public health  
606 preparedness. *Zoonoses Public Health*. 2017;65: 177–184.

607 43. Gu W, Lampman R, Novak R. Assessment of arbovirus vector infection rates using  
608 variable size pooling. *Med Vet Entomol*. 2004;18: 200–204.

609 44. Gu W, Lampman R, Novak RJ. Problems in estimating mosquito infection rates using  
610 minimum infection rate. *J Med Entomol*. 2003;40: 595–596.

611 45. Tedesco C, Ruiz M, McLafferty S. Mosquito politics: local vector control policies and  
612 the spread of West Nile Virus in the Chicago region. *Heal Place*. 2010;16: 1188–1195.

613 46. Hamer GL, Chaves LF, Anderson TK, Kitron UD, Brawn JD, Ruiz MO, et al. Fine-  
614 scale variation in vector host use and force of infection drive localized patterns of West  
615 Nile virus transmission. *PLoS One*. 2011;6. doi:10.1371/journal.pone.0023767

616 47. Reisen WK, Fang Y, Martinez VM. Effects of temperature on the transmission of West  
617 Nile virus by *Culex tarsalis* (Diptera: Culicidae). *J Med Entomol*. 2006;43: 309–317.

618 48. Kilpatrick AM, Meola MA, Moudy RM, Kramer LD. Temperature, viral genetics, and  
619 the transmission of West Nile virus by *Culex pipiens* mosquitoes. *PLoS Pathog*.  
620 2008;4.

- 621 49. Shand L, Brown WM, Chaves LF, Goldberg TL, Hamer GL, Haramis L, et al.  
622 Predicting West Nile Virus Infection Risk From the Synergistic Effects of Rainfall and  
623 Temperature. *J Med Entomol.* 2016;53: 935–944. doi:10.1093/jme/tjw042
- 624 50. Epstein PR. Climate change and emerging infectious diseases. *Microbes Infect.*  
625 2001;3: 747–754. Available:  
626 [http://www.ncbi.nlm.nih.gov/sites/entrez?Db=pubmed&DbFrom=pubmed&Cmd=Link&LinkName=pubmed\\_pubmed&LinkReadableName=Related](http://www.ncbi.nlm.nih.gov/sites/entrez?Db=pubmed&DbFrom=pubmed&Cmd=Link&LinkName=pubmed_pubmed&LinkReadableName=RelatedArticles&IdsFromResult=11489423&ordinalpos=3&itool=EntrezSystem2.PEntrez.Pubmed.Pubmed_ResultsPanel.Pubmed_RVDocSum)  
627 [Articles&IdsFromResult=11489423&ordinalpos=3&itool=EntrezSystem2.PEntrez.Pu](http://www.ncbi.nlm.nih.gov/sites/entrez?Db=pubmed&DbFrom=pubmed&Cmd=Link&LinkName=pubmed_pubmed&LinkReadableName=RelatedArticles&IdsFromResult=11489423&ordinalpos=3&itool=EntrezSystem2.PEntrez.Pubmed.Pubmed_ResultsPanel.Pubmed_RVDocSum)  
628 [bmed.Pubmed\\_ResultsPanel.Pubmed\\_RVDocSum](http://www.ncbi.nlm.nih.gov/sites/entrez?Db=pubmed&DbFrom=pubmed&Cmd=Link&LinkName=pubmed_pubmed&LinkReadableName=RelatedArticles&IdsFromResult=11489423&ordinalpos=3&itool=EntrezSystem2.PEntrez.Pubmed.Pubmed_ResultsPanel.Pubmed_RVDocSum)  
629
- 630 51. Morin CW, Comrie AC. Regional and seasonal response of a West Nile virus vector to  
631 climate change. *Proc Natl Acad Sci U S A.* 2013;11: 15620–15625.
- 632 52. Mulatti P, Ferguson HM, Bonfanti L, Montarsi F, Capelli G, Marangon S.  
633 Determinants of the population growth of the West Nile virus mosquito vector *Culex*  
634 *pipiens* in a repeatedly affected area in Italy. *Parasit Vectors.* 2014;7.1: 26.
- 635 53. Johnson GD, Eidson M, Schmit K, Ellis A, Kulldorff M. Geographic prediction of  
636 human onset of West Nile virus using dead crow clusters: An evaluation of year 2002  
637 data in New York State. *Am J Epidemiol.* 2006;163: 171–180. doi:10.1093/aje/kwj023
- 638 54. Valiakos G, Papaspyropoulos K, Giannakopoulos A, Birtsas P, Tsiodras S, Hutchings  
639 MR, et al. Use of wild bird surveillance, human case data and GIS spatial analysis for  
640 predicting spatial distributions of West Nile virus in Greece. *PLoS One.* 2014;9.  
641 doi:10.1371/journal.pone.0096935
- 642 55. Roberts RS, Foppa IM. Prediction of Equine Risk of West Nile Virus Infection Based  
643 on Dead Bird Surveillance. *Vector-Borne Zoonotic Dis.* 2006;6: 1–6.  
644 doi:10.1089/vbz.2006.6.1
- 645 56. Illinois Department of Public Health. West Nile Virus [Internet]. 2020. Available:  
646 <http://www.dph.illinois.gov/topics-services/diseases-and-conditions/west-nile-virus>  
647  
648

Reviewer #1: Peer review report on PLOS ONE manuscript " The drivers of West Nile virus human illness: fine scale dynamic effects of weather, mosquito infection, social, and biological conditions", (Manuscript number PONE-D-19-34216).

Recommendation: Minor Revision

Comments to Authors:

This manuscript analyzes the available long-term data of mosquito infection rates, West Nile virus human cases and weather variables from 2005 to 2016 combined with landscape and demographic characteristics of two Illinois counties of the Chicago region in order to evaluate relationships between the factors on fine temporal and spatial scale and identify the drivers that potentially affect the presence of human WNV illness and may act as early warning predictors.

The paper is well written with a well-organized text, the data were analyzed using multi-level statistical modeling approaches and the findings are sufficiently documented and the results are valuable for a better understanding of the fine-scale drivers of spatiotemporal variability of WNV human case prevalence in an urban environment such as in the study area.

Although numerous published studies that have shed light on factors that affect WNV transmission in an area, the knowledge regarding the influence of climatic variables in correlation with the data from the entomological surveillance and the number of WNV human cases, is still limited.

For that reason, the paper makes a substantial contribution to the literature and is therefore recommended for publication in PLOS-ONE after minor revision taking into account the following general or specific comments.

- Thank you for your comments and your feedback!

General comments

The study uses and analyzes the 10-year data (2005 to 2014) from Cook and DuPage counties in the Chicago, Illinois region and the accuracy of the predictions of the developed model tested with the data of the same specific area.

However, according to the literature, it is well known that models predicting the WNV transmission and human WNV infections do not always have the same accuracy when applied to other areas with different mosquito fauna, weather conditions and/or geomorphological and demographic characteristics. Therefore, we consider that the study area should also be mentioned in the title.

- Thank you for the suggestion, we have made that change

Please comment and, if necessary, provide an adequate justification in the manuscript, for the reason that in this work were not included data from passive or active monitoring of WNV presence in birds

and equids, which are considered by several authors as important prediction factors of the presence and spread of WNV virus in an area.

- We have added a statement (145-147) that the avian and equid surveillance programs were not consistent across the time period, and added a discussion section (467-474) about the point.

#### Specific comments

Line 170 of the manuscript: If available, please provide information on the species of *Culex* mosquitoes that have been tested for WNV presence as the vectorial competence of different species may vary significantly for WNV transmission to humans.

- We agree that is an important point; we have added some information as to common species in the region.

Line 179 of the manuscript: Please add a bibliographical reference in the reference section for the MIR estimation tool by Biggerstaff, 2006.

- Thank you, corrected

Line 188 of the manuscript: Please provide a definition and some additional information about the category of "probable cases of WNV" that were also included in the study along with the "confirmed cases" because the symptoms of infection by the West Nile vary in severity, with the mild forms can be easily confused with flu symptoms and usually go unreported.

- We have added the information. The difference between probable and confirmed cases is confirmatory testing by either IDPH or CDC; all cases had positive diagnostic results and clinical signs during the likely transmission season.

Lines 578-580 of the manuscript: Please, correct Reference no 39 by adding the name of the journal, volume number and pages numbers.

Messina JP, Brown W, Amore G, Kitron UD, Ruiz MO. West Nile Virus in the Greater Chicago Area : A Geographic Examination of Human Illness and Risk from 2002 to 2006. *URISA Journal* 2011;23: 5-18.

- Corrected

Reviewer #2: Dear authors,

This is a well written paper that deals with the determination of factors affecting the spatiotemporal

variability of WNV cases in humans through identification of the fine scale drivers of WNV transmission in an urban area with a repeated history of WNV outbreaks. The findings are very interesting since they include multi-level modeling of weekly data from over a decade and they extend our knowledge in the correlation of variables related to temperature, precipitation, mosquito infection, land cover, and demographic characteristics with the probability of an area having a WNV case or not.

- Thank you

Further down please consider some comments of minor importance that may benefit the manuscript.

It seems that the infection status of avian population, as primary reservoirs of WNV, and equids, as dead-end hosts, were not included among the tested variables for modeling structure. Please note that these are critical factors implicated in the WNV transmission in order to develop predictive models. As mentioned in the introduction, public health surveillance for WNV involves collection and testing of dead birds suspected to have died of WNV, testing of sentinel chickens or of wild birds captured for this purpose and reporting of cases of equine illness.

Could you please justify this data gap in the model structuring? Is there any surveillance system for infected avian and equids population in the study area?

In the "Introduction" you may add any relevant literature data where bird and/or equine infection rate were used for development of models predicting WNV transmission in humans. Also, in lines 440-459 of the manuscript, you could mention the fact that avian and equids infection status was not considered as a factor for prediction of WNV cases in humans in the study area.

- We have added a statement as to the inconsistent application of avian and equid surveillance in this region (145-147), and given more information about that surveillance in the discussion (467-474), including references to models using these data types.

According to the best multivariable model that was used, the proportion of open water was negatively associated with the probability of WNV cases. Also, as mentioned in the discussion, a negative association of precipitation and WNV cases was observed and this indicates that dry and hot weather conditions would increase the probability of an area being positive for a WNV case.

Instead, it is supposed that high rainfall and high percentage of water bodies in an area may favor mosquito population by increasing their breeding sites, and therefore may lead to increased WNV cases in humans. Hence, a positive correlation between precipitation and water bodies with WNV cases in humans is anticipated. Please comment.

- Open water is classified as areas in which any aquatic vegetation is submerged, as opposed to woody or herbaceous wetlands. This is not likely to be stagnant water of the type used by *Culex* mosquitoes for breeding. Therefore, the negative association between proportion of open water and WNV cases is most likely due to the fact that open water, as defined, does not favor the mosquito population. We have noted this in the discussion (434-438).
